# Supplementary material for: Puf3 contributes to changes in mRNA solubility, translation elongation dynamics at rare arginine codons and loss of protein homeostasis in cells lacking Not4
Source: bioRxiv preprint, doi:10.64898/2025.12.31.695943, version 1 (2026-01-01)
Supplement: Supplemental Table S2 [file 695943_file03.xlsx]

## Sheet: Sheet1
Table S2. Changes in protein aggregation in not4D versus not4Dpuf3D
ProteinGroups	ProteinDescriptions	AVG.Log2.Ratio_not4 / not4puf3	Qvalue_not4 / not4puf3
Q00955	Acetyl-CoA carboxylase	0.958202	1.06e-77
Q00402	Nuclear migration protein NUM1	2.02821	1.67e-44
Q12019	Midasin	0.252771	3.26e-37
P40482	Protein transport protein SEC24	1.92536	3.21e-36
P07259	Protein URA2	0.915164	6.01e-36
P00925	Enolase 2	-0.984681	1.72e-35
P13433	DNA-directed RNA polymerase, mitochondrial	-0.961374	8.27e-35
P15303	Protein transport protein SEC23	1.5281	4.67e-34
P38968	Protein transport protein SEC31	1.51207	5.2e-34
P32568	Protein SNQ2	0.73604	2.21e-33
Q08972	[NU+] prion formation protein 1	0.72672	9.59e-32
P53327	RQC trigger complex helicase SLH1	0.932706	1.06e-30
P47047	ATP-dependent RNA helicase DOB1	1.28458	3.14e-29
Q06698	Putative ATP-dependent RNA helicase YLR419W	0.53321	4.37e-29
Q06668	Methyltransferase OMS1, mitochondrial	-1.21004	1.94e-28
Q05022	rRNA biogenesis protein RRP5	0.700779	6.18e-28
Q04217	Probable ATP-dependent RNA helicase DHR1	0.818051	6.78e-28
P00942	Triosephosphate isomerase	-2.77783	6.65e-27
P40989	1,3-beta-glucan synthase component GSC2	1.1158	1e-25
P38249	Eukaryotic translation initiation factor 3 subunit A	0.428434	4.39e-25
P12753	DNA repair protein RAD50	0.763797	9.07e-25
P39960	GTPase-activating protein BEM2/IPL2	0.336045	9.07e-25
P25379	Catabolic L-serine/threonine dehydratase	1.05708	1.63e-24
Q03921	Protein dopey	0.642615	2.35e-24
P00924	Enolase 1	-1.39607	1.12e-23
P18963	Inhibitory regulator protein IRA1	0.274762	2.46e-23
P47037	Structural maintenance of chromosomes protein 3	0.870841	5.94e-23
P35194	U3 small nucleolar RNA-associated protein 20	-0.108943	1.9e-22
P53254	U3 small nucleolar RNA-associated protein 22	0.558413	4.1e-22
P53049	Oligomycin resistance ATP-dependent permease YOR1	0.732413	6.7e-22
P14742	Glutamine--fructose-6-phosphate aminotransferase [isomerizing]	0.934107	8.79e-22
P32908	Structural maintenance of chromosomes protein 1	0.823688	8.79e-22
P08964	Myosin-1	1.02093	1.02e-21
Q04439	Myosin-5	0.735598	1.02e-21
P42945	U3 small nucleolar RNA-associated protein 10	0.770042	2.11e-21
P53091	DNA replication licensing factor MCM6	0.572349	2.11e-21
P08518	DNA-directed RNA polymerase II subunit RPB2	0.617306	3.74e-21
P53914	RNA cytidine acetyltransferase	0.768537	4.11e-21
P29496	Minichromosome maintenance protein 5	0.216246	7.1e-21
P22138	DNA-directed RNA polymerase I subunit RPA135	0.782694	1.54e-20
Q08965	Ribosome biogenesis protein BMS1	0.909287	1.54e-20
P34241	Nucleolar pre-ribosomal-associated protein 1	0.857598	2.01e-20
P40468	Cell morphogenesis protein PAG1	0.417929	3.66e-20
P53742	Nucleolar GTP-binding protein 2	0.640462	6.74e-20
P16861	ATP-dependent 6-phosphofructokinase subunit alpha	0.854543	7.26e-20
P25087	Sterol 24-C-methyltransferase ERG6	1.49282	8.38e-20
P33299	26S proteasome regulatory subunit 7 homolog	0.586353	1.11e-19
P32565	26S proteasome regulatory subunit RPN2	0.604322	1.44e-19
P25039	Elongation factor G, mitochondrial	-1.40186	1.86e-19
P30665	DNA replication licensing factor MCM4	0.647841	2.32e-19
P13382	DNA polymerase alpha catalytic subunit A	0.465701	2.97e-19
P48415	COPII coat assembly protein SEC16	0.922513	3.28e-19
P38873	Target of rapamycin complex 1 subunit KOG1	0.535027	3.39e-19
P36048	Pre-mRNA-splicing factor SNU114	0.997218	4.78e-19
P07342	Acetolactate synthase catalytic subunit, mitochondrial	0.883752	5.61e-19
P02994	Elongation factor 1-alpha	0.539364	6.98e-19
P35169	Serine/threonine-protein kinase TOR1	0.577871	1.05e-18
P33760	Peroxisomal ATPase PEX6	0.780758	1.66e-18
P39078	T-complex protein 1 subunit delta	0.87388	1.78e-18
P38811	Transcription-associated protein 1	0.176646	1.97e-18
P32600	Serine/threonine-protein kinase TOR2	0.986339	3.28e-18
Q03640	Tricalbin-3	0.754567	3.29e-18
P35207	Antiviral helicase SKI2	0.477259	3.42e-18
P38764	26S proteasome regulatory subunit RPN1	0.511893	3.89e-18
P20967	2-oxoglutarate dehydrogenase, mitochondrial	0.575605	4.29e-18
P10614	Lanosterol 14-alpha demethylase CYP51	0.741523	5.97e-18
P11972	Protein SST2	0.668522	6.5e-18
P25491	Mitochondrial protein import protein MAS5	0.749757	1.37e-17
P36006	Myosin-3	0.890282	1.67e-17
Q12018	Cell division control protein 53	0.908306	1.97e-17
P24279	DNA replication licensing factor MCM3	0.985406	2.77e-17
P36013	NAD-dependent malic enzyme, mitochondrial	0.751426	3.21e-17
P21264	Phosphoribosylaminoimidazole carboxylase	0.54341	4.08e-17
P28319	Cell wall protein CWP1	-1.39225	4.08e-17
P38717	Membrane-anchored lipid-binding protein SIP3	0.160439	6.03e-17
P25655	General negative regulator of transcription subunit 1	0.455447	8.32e-17
P32582	Cystathionine beta-synthase	0.659938	1.3e-16
P32639	Pre-mRNA-splicing helicase BRR2	0.917929	1.3e-16
P47170	Vacuolar membrane-associated protein IML1	0.72188	1.4e-16
P38112	ATP-dependent RNA helicase MAK5	0.59299	1.64e-16
P00817	Inorganic pyrophosphatase	-0.695134	1.75e-16
P33892	eIF-2-alpha kinase activator GCN1	0.902183	1.75e-16
Q06106	Multiple RNA-binding domain-containing protein 1	0.695685	2.03e-16
P00958	Methionine--tRNA ligase, cytoplasmic	0.784012	2.28e-16
P38712	ATP-dependent rRNA helicase RRP3	1.04044	2.77e-16
P40024	ABC transporter ATP-binding protein ARB1	0.749259	2.77e-16
P38920	DNA mismatch repair protein MLH1	0.867209	4.46e-16
Q06179	Protein FMP27, mitochondrial	0.613974	4.46e-16
P46367	Potassium-activated aldehyde dehydrogenase, mitochondrial	0.744908	4.99e-16
Q05506	Arginine--tRNA ligase, cytoplasmic	0.917537	5.52e-16
Q03940	RuvB-like protein 1	0.844501	6.9e-16
P38219	Obg-like ATPase 1	0.612837	8.26e-16
P53953	SED5-binding protein 2	0.88208	9.7e-16
P47054	Nucleoporin NUP192	0.247295	1.15e-15
P0CS90	Import motor subunit, mitochondrial	-0.576912	1.57e-15
P48562	Serine/threonine-protein kinase CLA4	0.62322	1.9e-15
P18759	Vesicular-fusion protein SEC18	0.587791	2.38e-15
P32644	Putative ATP-dependent RNA helicase ECM32	0.790695	2.6e-15
P21576	Vacuolar protein sorting-associated protein 1	0.652326	2.61e-15
P27472	Glycogen [starch] synthase isoform 2	0.910128	3.28e-15
P37297	Phosphatidylinositol 4-kinase STT4	0.778322	3.28e-15
P40010	Nuclear GTP-binding protein NUG1	0.819196	3.48e-15
P20447	ATP-dependent RNA helicase DBP3	0.584943	3.58e-15
P32791	Ferric/cupric reductase transmembrane component 1	0.738196	4.86e-15
P20448	ATP-dependent RNA helicase HCA4	0.863567	6.19e-15
P19158	Inhibitory regulator protein IRA2	0.589579	7.73e-15
P38181	Nucleoporin NUP170	0.554424	8.14e-15
P38737	Proteasome component ECM29	1.03637	1.06e-14
P34077	Nucleoporin NIC96	0.497292	1.52e-14
P39730	Eukaryotic translation initiation factor 5B	0.710846	1.6e-14
P38144	ISWI chromatin-remodeling complex ATPase ISW1	0.872548	2.24e-14
P32419	Malate dehydrogenase, peroxisomal	1.0618	2.72e-14
P53326	Uncharacterized protein YGR266W	1.0902	2.91e-14
Q06681	Membrane-anchored lipid-binding protein YSP2	0.733444	3e-14
P35191	DnaJ homolog 1, mitochondrial	0.291629	3.68e-14
P40498	U3 small nucleolar RNA-associated protein 25	0.847422	4.45e-14
P19097	Fatty acid synthase subunit alpha	-0.165352	4.5e-14
P48563	Protein MON2	0.627221	4.75e-14
P49095	Glycine dehydrogenase (decarboxylating), mitochondrial	1.17078	5.37e-14
Q06625	Glycogen debranching enzyme	1.21368	5.37e-14
P10964	DNA-directed RNA polymerase I subunit RPA190	0.376104	6.59e-14
P24783	ATP-dependent RNA helicase DBP2	0.411837	6.78e-14
P22276	DNA-directed RNA polymerase III subunit RPC2	0.776468	6.99e-14
Q05050	Eisosome protein 1	0.921127	7.77e-14
Q12363	Transcriptional modulator WTM1	-1.13689	7.78e-14
P23615	Transcription elongation factor SPT6	0.623092	8.06e-14
P28274	CTP synthase 1	0.491387	8.74e-14
P07149	Fatty acid synthase subunit beta	0.219196	1.39e-13
P38065	AP-2 complex subunit alpha	0.528472	1.45e-13
P40064	Nucleoporin NUP157	0.49232	1.71e-13
P09440	C-1-tetrahydrofolate synthase, mitochondrial	0.947585	1.73e-13
P32324	Elongation factor 2	0.511998	1.99e-13
P05453	Eukaryotic peptide chain release factor GTP-binding subunit	0.981871	2.53e-13
P47912	Long-chain-fatty-acid--CoA ligase 4	0.702268	2.53e-13
P38625	GMP synthase [glutamine-hydrolyzing]	0.62781	3.29e-13
P38929	Calcium-transporting ATPase 2	0.780781	4.3e-13
P17883	Superkiller protein 3	0.684978	5.24e-13
Q02773	Ribonuclease P protein component, mitochondrial	0.673378	6.22e-13
P04050	DNA-directed RNA polymerase II subunit RPB1	0.0745188	7.14e-13
P27801	Vacuolar membrane protein PEP3	0.722105	7.19e-13
P25847	DNA mismatch repair protein MSH2	0.896825	7.34e-13
P50942	Polyphosphatidylinositol phosphatase INP52	0.781813	7.84e-13
P06634	ATP-dependent RNA helicase DED1	0.563202	8.01e-13
P89105	RNA polymerase-associated protein CTR9	0.962769	8.07e-13
P35845	Oxysterol-binding protein homolog 1	1.06983	9.49e-13
P38630	Replication factor C subunit 1	0.46379	1.01e-12
Q04958	Lysophospholipase NTE1	0.314273	1.1e-12
P53131	Pre-mRNA-splicing factor ATP-dependent RNA helicase PRP43	0.913923	1.14e-12
P40991	25S rRNA (cytosine(2870)-C(5))-methyltransferase	0.823328	1.16e-12
P32916	Signal recognition particle receptor subunit alpha homolog	0.449824	1.42e-12
Q06409	DOCK-like protein 1	0.66633	1.49e-12
P40327	26S proteasome regulatory subunit 4 homolog	0.693012	1.59e-12
Q12532	Ribosome quality control complex subunit 2	0.792342	1.69e-12
Q02895	Putative aryl-alcohol dehydrogenase AAD16	1.2713	1.73e-12
P36126	Phospholipase D1	0.491134	1.79e-12
Q12038	Lethal(2) giant larvae protein homolog SRO7	0.747379	1.83e-12
P19524	Myosin-2	0.662732	1.93e-12
P47117	Actin-related protein 3	0.793189	2.01e-12
Q06685	Inositol hexakisphosphate and diphosphoinositol-pentakisphosphate kinase	0.765637	2.01e-12
Q12267	Structural maintenance of chromosomes protein 4	-0.833336	2.66e-12
P47077	Nucleolar protein 9	0.733979	2.89e-12
Q08909	Uncharacterized protein YOR385W	1.25708	3.28e-12
Q01939	26S proteasome regulatory subunit 8 homolog	0.543504	3.39e-12
P38805	Ribosome production factor 1	1.01967	3.55e-12
P48361	Activator of SKN7 protein 10	0.667249	3.74e-12
P53145	Large subunit GTPase 1	0.608434	3.99e-12
P38129	Transcription initiation factor TFIID subunit 5	0.691424	4.14e-12
Q07844	Ribosome biogenesis ATPase RIX7	0.784616	4.95e-12
P23293	Serine/threonine-protein kinase BUR1	0.884378	4.96e-12
Q04062	26S proteasome regulatory subunit RPN9	0.711993	5.25e-12
P32917	Protein STE5	0.794906	5.47e-12
P21951	DNA polymerase epsilon catalytic subunit A	0.552383	5.69e-12
Q03834	DNA mismatch repair protein MSH6	0.453875	6.68e-12
P25294	Protein SIS1	0.654601	6.71e-12
Q12271	Polyphosphatidylinositol phosphatase INP53	0.622897	7.16e-12
P30624	Long-chain-fatty-acid--CoA ligase 1	0.704017	7.71e-12
P13188	Glutamine--tRNA ligase	0.594582	7.89e-12
P53893	Ribosome assembly protein 1	0.622114	8.23e-12
P07248	Regulatory protein ADR1	0.691861	8.25e-12
P07278	cAMP-dependent protein kinase regulatory subunit	1.12368	9.03e-12
P40360	Amino-acid acetyltransferase, mitochondrial	1.03726	9.76e-12
P24280	SEC14 cytosolic factor	-0.952079	1.18e-11
P25382	Ribosome assembly protein 4	0.729358	1.21e-11
P27351	AP-2 complex subunit beta	1.11988	1.26e-11
P11433	Cell division control protein 24	0.688086	1.4e-11
P53313	Protein SDA1	0.913359	1.53e-11
Q03690	Clustered mitochondria protein 1	0.423123	1.74e-11
Q01217	Protein ARG5,6, mitochondrial	0.36828	1.83e-11
P32521	Actin cytoskeleton-regulatory complex protein PAN1	0.362433	1.86e-11
P32525	Protein ECM25	0.809701	1.86e-11
P32790	Actin cytoskeleton-regulatory complex protein SLA1	0.557511	1.9e-11
P39685	Nucleoporin POM152	0.752702	1.9e-11
P40032	Prolyl 3,4-dihydroxylase TPA1	0.604645	1.9e-11
Q06706	Elongator complex protein 1	0.317868	1.9e-11
P07245	C-1-tetrahydrofolate synthase, cytoplasmic	0.547614	1.96e-11
P40055	U3 small nucleolar RNA-associated protein 7	0.941521	1.96e-11
P19414	Aconitate hydratase, mitochondrial	0.695673	2.27e-11
P0CX23;P0CX24	Large ribosomal subunit protein eL20A;Large ribosomal subunit protein eL20B	0.567722	2.38e-11
P52593	Nucleoporin NUP188	0.681384	2.47e-11
Q02354	U3 small nucleolar RNA-associated protein 6	0.706426	2.81e-11
P24276	Protein SSD1	0.463195	2.88e-11
Q04336	Uncharacterized protein YMR196W	1.16682	2.99e-11
P41810	Coatomer subunit beta	0.708804	3.54e-11
P08004	Chitin synthase 1	0.809266	3.61e-11
P00927	Threonine dehydratase, mitochondrial	0.56172	3.64e-11
P04807	Hexokinase-2	-0.40067	3.75e-11
P53972	25S rRNA (cytosine(2278)-C(5))-methyltransferase	0.532014	4.01e-11
Q12265	Ribose-phosphate pyrophosphokinase 5	0.559726	4.28e-11
Q03660	Trafficking protein particle complex II-specific subunit 130	0.838568	4.37e-11
P47108	Nucleolar pre-ribosomal-associated protein 2	0.36027	5.1e-11
P53241	Vitamin H transporter	0.766906	5.14e-11
P20095	Pre-mRNA-splicing factor ATP-dependent RNA helicase-like protein PRP2	0.904501	5.23e-11
Q12263	Serine/threonine-protein kinase GIN4	0.456032	5.59e-11
P09624	Dihydrolipoyl dehydrogenase, mitochondrial	0.569254	5.82e-11
Q05580	E3 ubiquitin-protein ligase HEL2	0.952284	5.85e-11
Q01802	Aspartate aminotransferase, mitochondrial	0.727371	6.5e-11
P38174	Methionine aminopeptidase 2	0.906194	6.6e-11
P38111	Serine/threonine-protein kinase MEC1	1.42551	6.76e-11
P43593	Ubiquitin carboxyl-terminal hydrolase 6	0.701185	7.03e-11
P21965	Protein kinase MCK1	0.708364	7.06e-11
P53731	Actin-related protein 2/3 complex subunit 2	0.770425	7.57e-11
Q03016	GLC7-interacting protein 3	0.763468	9.13e-11
P39002	Long-chain-fatty-acid--CoA ligase 3	0.818872	1.02e-10
P53261	Pescadillo homolog	1.01195	1.15e-10
P14741	Translation initiation factor eIF-2B subunit alpha	0.70278	1.35e-10
P38167	Protein ECM21	0.860497	1.36e-10
P38713	Oxysterol-binding protein homolog 3	0.744722	1.55e-10
P31380	ATP-dependent helicase FUN30	0.620747	1.63e-10
P06103	Eukaryotic translation initiation factor 3 subunit B	0.723976	1.86e-10
Q01477	Ubiquitin carboxyl-terminal hydrolase 3	0.750209	1.86e-10
P49367	Homoaconitase, mitochondrial	0.917857	1.94e-10
P12945	N-terminal acetyltransferase A complex subunit NAT1	0.927915	1.97e-10
P17119	Kinesin-like protein KAR3	0.525669	2.21e-10
P41811	Coatomer subunit beta'	0.620925	2.77e-10
P00890	Citrate synthase, mitochondrial	0.907471	2.83e-10
P14126	Large ribosomal subunit protein uL3	0.550609	2.83e-10
P47116	Serine/threonine-protein kinase PTK2/STK2	0.423615	2.88e-10
Q03774	tRNA (guanine-N(7)-)-methyltransferase non-catalytic subunit TRM82	0.881708	2.9e-10
P08566	Pentafunctional AROM polypeptide	0.0764568	2.94e-10
P38086	DNA repair and recombination protein RDH54	0.623402	2.94e-10
Q12386	Actin-like protein ARP8	1.03689	3e-10
P05374	Phosphatidylethanolamine N-methyltransferase	0.702304	3.02e-10
P38328	Actin-related protein 2/3 complex subunit 1	0.85291	3.15e-10
P39109	Metal resistance protein YCF1	0.582538	3.2e-10
P12688	Serine/threonine-protein kinase YPK1	0.803319	3.26e-10
P43535	Protein GCN20	0.757664	3.5e-10
P21268	Cyclin-dependent kinase inhibitor FAR1	1.01913	3.53e-10
Q07807	mRNA-binding protein PUF3	3.7573	3.94e-10
P38689	Ribose-phosphate pyrophosphokinase 3	0.939802	4.37e-10
P16550	Protein APA1	0.600581	4.6e-10
P23585	High-affinity glucose transporter HXT2	0.825883	4.61e-10
P38691	Serine/threonine-protein kinase KSP1	0.676299	4.61e-10
Q04660	Ribosome biogenesis protein ERB1	0.596212	4.74e-10
Q02207	Peroxisomal hydratase-dehydrogenase-epimerase	0.68688	5.07e-10
Q12168	Glucan endo-1,3-beta-D-glucosidase 2	-0.762119	5.08e-10
P16862	ATP-dependent 6-phosphofructokinase subunit beta	0.653362	5.46e-10
P47031	Inclusion body clearance protein IML2	0.424234	5.47e-10
P40851	Putative protease AXL1	0.453688	5.47e-10
P53114	Mediator of RNA polymerase II transcription subunit 5	0.850621	5.61e-10
Q00873	Holocytochrome-c1 synthase	-0.955749	5.73e-10
P25808	ATP-dependent rRNA helicase SPB4	0.78002	5.76e-10
P40850	Post-transcriptional regulator MKT1	0.390009	5.81e-10
P32380	Spindle pole body component 110	0.261002	6.2e-10
P32892	ATP-dependent RNA helicase DRS1	0.630232	6.2e-10
Q12466	Tricalbin-1	0.6094	6.67e-10
P21269	CCA tRNA nucleotidyltransferase, mitochondrial	0.64166	7.47e-10
P38323	ATP-dependent clpX-like chaperone, mitochondrial	0.508171	7.92e-10
P32604	Fructose-2,6-bisphosphatase	0.753547	7.95e-10
P16603	NADPH--cytochrome P450 reductase	0.832098	8.08e-10
Q05812	Meiotic sister-chromatid recombination protein 3	0.573384	8.2e-10
P39729	Ribosome-interacting GTPase 1	0.715631	8.88e-10
Q08282	tRNA wybutosine-synthesizing protein 4	0.447329	9.74e-10
Q12443	Reticulon-like protein 2	1.62229	9.74e-10
P39976	D-2-hydroxyglutarate--pyruvate transhydrogenase DLD3	1.00816	1.03e-09
P00899	Anthranilate synthase component 1	0.926308	1.06e-09
P28834	Isocitrate dehydrogenase [NAD] subunit 1, mitochondrial	0.879961	1.08e-09
Q12149	Exosome complex exonuclease RRP6	0.686099	1.16e-09
Q02908	Elongator complex protein 3	0.680957	1.21e-09
P15703	Glucan 1,3-beta-glucosidase	-0.699629	1.24e-09
P40053	Altered inheritance of mitochondria protein 9, mitochondrial	0.456997	1.25e-09
P14680	Dual specificity protein kinase YAK1	0.633394	1.38e-09
P42841	Polyadenylation factor subunit 2	0.765483	1.4e-09
P39980	Siderophore iron transporter 1	1.54193	1.48e-09
P38861	60S ribosomal export protein NMD3	0.474663	1.65e-09
P16474	Endoplasmic reticulum chaperone BiP	0.353654	1.82e-09
P38970	Serine/threonine-protein kinase HAL5	0.675316	1.85e-09
P38688	Signal recognition particle subunit SRP72	0.787501	1.87e-09
P45818	ATP-dependent RNA helicase ROK1	0.736386	1.87e-09
Q06440	Coronin-like protein	0.795683	2.02e-09
P32855	Exocyst complex component SEC8	0.561246	2.05e-09
Q04225	Ribosome assembly protein RRB1	0.91585	2.23e-09
Q12389	ATP-dependent RNA helicase DBP10	0.187243	2.5e-09
P15436	DNA polymerase delta catalytic subunit	0.586024	2.5e-09
Q01163	Small ribosomal subunit protein mS29	0.297815	2.59e-09
Q06704	Golgin IMH1	0.407238	2.63e-09
P47029	Arrestin-related trafficking adapter 3	0.411066	2.78e-09
Q08979	Kelch repeat-containing protein 3	0.734664	2.78e-09
Q04693	Pre-mRNA-splicing factor RSE1	0.989237	3.04e-09
P46962	CTD kinase subunit beta	0.997736	3.2e-09
P32381	Actin-related protein 2	0.907506	3.37e-09
P39526	AP-1 accessory protein LAA1	0.613408	3.39e-09
Q12387	N-terminal acetyltransferase B complex subunit MDM20	0.822564	3.39e-09
P04806	Hexokinase-1	-0.603414	3.6e-09
Q02979	Glycerophosphocholine phosphodiesterase GDE1	0.331671	3.7e-09
P29468	Poly(A) polymerase	0.830771	3.84e-09
P40160	Serine/threonine-protein kinase RIO2	0.702376	3.84e-09
P38994	Phosphatidylinositol 4-phosphate 5-kinase MSS4	0.65555	3.93e-09
P12754	Translation initiation factor eIF-2B subunit delta	0.69672	3.96e-09
P38851	Membrane-anchored lipid-binding protein LAM1	0.712006	4.03e-09
Q07533	Cytokinesis protein 3	0.520827	4.04e-09
P07264	3-isopropylmalate dehydratase	0.323475	4.07e-09
P47104	Regulator of V-ATPase in vacuolar membrane protein 1	1.44373	4.27e-09
P15019	Transaldolase	-0.593367	4.35e-09
P22855	Alpha-mannosidase	0.893913	4.35e-09
P53723	UPF0674 endoplasmic reticulum membrane protein YNR021W	0.576148	4.36e-09
Q12280	Ras GTPase-activating-like protein IQG1	0.458727	4.36e-09
Q12680	Glutamate synthase [NADH]	0.118316	4.5e-09
P33338	Protein SLA2	1.22117	4.59e-09
Q12114	Chitin biosynthesis protein CHS5	0.804749	4.84e-09
P38629	Replication factor C subunit 3	0.685745	5.4e-09
P22517	Calcium/calmodulin-dependent protein kinase II	0.571187	5.4e-09
Q12447	Polyamine N-acetyltransferase 1	0.614419	5.48e-09
P32849	DNA repair protein RAD5	0.928259	5.51e-09
P20457	DNA primase large subunit	0.720296	6.17e-09
Q03104	Meiotic sister chromatid recombination protein 1	0.85218	6.37e-09
P38719	ATP-dependent RNA helicase DBP8	0.801387	6.49e-09
Q02892	Nucleolar GTP-binding protein 1	0.617199	6.66e-09
P53622	Coatomer subunit alpha	0.585	6.8e-09
P23180	Probable oxidoreductase AIM17	0.561194	7.68e-09
P53101	Cystathionine beta-lyase	0.0939434	7.94e-09
Q04183	Trafficking protein particle complex II-specific subunit 120	0.693443	7.94e-09
P53100	Putative 2-hydroxyacid dehydrogenase YGL185C	0.587528	7.98e-09
P17709	Glucokinase-1	-0.545192	8.04e-09
P53172	Protein SDS23	0.260067	8.5e-09
P54791	Origin recognition complex subunit 4	0.586981	8.5e-09
P38121	DNA polymerase alpha subunit B	0.728622	8.99e-09
P09032	Translation initiation factor eIF-2B subunit gamma	0.72362	9.3e-09
P38164	SEH-associated protein 4	0.652115	1.01e-08
Q00416	Helicase SEN1	0.45106	1.02e-08
P36009	Probable ATP-dependent RNA helicase DHR2	0.853491	1.02e-08
P32368	Phosphatidylinositol-3-phosphatase SAC1	0.375501	1.1e-08
P41735	5-demethoxyubiquinone hydroxylase, mitochondrial	1.00148	1.13e-08
P32598	Serine/threonine-protein phosphatase PP1-2	0.69856	1.22e-08
P51534	SWI5-dependent HO expression protein 4	1.05199	1.24e-08
P32259	Mediator of RNA polymerase II transcription subunit 16	0.429414	1.29e-08
Q03305	Protein arginine N-methyltransferase 2	0.790632	1.35e-08
Q04264	Sister chromatid cohesion protein PDS5	0.587509	1.41e-08
P38708	Putative proline--tRNA ligase YHR020W	0.475685	1.54e-08
P17536	Tropomyosin-1	-0.489795	1.55e-08
P34760	Peroxiredoxin TSA1	-0.588896	1.62e-08
P32657	Chromo domain-containing protein 1	0.257042	1.65e-08
P40348	Replication factor C subunit 2	0.541012	1.65e-08
Q92331	Vacuolar protein sorting-associated protein 5	0.618024	1.73e-08
Q03177	WD repeat-containing protein YMR102C	0.732823	2.08e-08
Q12754	Ribosomal RNA-processing protein 12	0.58445	2.15e-08
Q07657	Seventh homolog of septin 1	0.688491	2.16e-08
P48234	Ribosome biogenesis protein ENP2	0.66805	2.26e-08
Q08299	Siderophore iron transporter ENB1	1.13581	2.34e-08
P39077	T-complex protein 1 subunit gamma	0.456525	2.39e-08
P38205	Multisite-specific tRNA:(cytosine-C(5))-methyltransferase	-0.0717268	2.69e-08
P53136	Ribosome biogenesis protein NSA1	0.695246	2.77e-08
P38883	Pre-rRNA-processing protein RIX1	0.562777	2.86e-08
P32364	Kinesin-related protein SMY1	0.839047	2.86e-08
P00937	Multifunctional tryptophan biosynthesis protein	0.354277	2.9e-08
P53120	Uncharacterized membrane protein YGL140C	0.639793	3.33e-08
P53552	THO complex subunit 2	0.424993	3.41e-08
Q03208	Uncharacterized protein YML119W	0.8192	3.92e-08
Q12099	ATP-dependent RNA helicase FAL1	0.760389	4.02e-08
P47061	Vacuolar protein sorting-associated protein 53	0.398772	4.16e-08
Q12196	Serine/threonine-protein kinase RIO1	0.808064	4.17e-08
P49955	U2 snRNP component HSH155	1.02856	4.18e-08
P04819	DNA ligase 1	0.861465	4.36e-08
P12709	Glucose-6-phosphate isomerase	-1.03337	4.36e-08
P39518	Long-chain-fatty-acid--CoA ligase 2	0.422882	4.48e-08
P36161	Nucleoporin NUP133	0.424794	4.56e-08
Q03144	Pyridoxal 5'-phosphate synthase subunit SNO1	2.18066	4.56e-08
P38694	Putative aldehyde dehydrogenase-like protein YHR039C	0.596061	4.67e-08
Q07799	ELMO family protein LMO1	0.515436	4.7e-08
P33201	Ribosome assembly factor MRT4	0.554171	4.77e-08
P40485	Phosphatidylinositol 4,5-bisphosphate-binding protein SLM1	0.612291	4.77e-08
Q00772	Mitogen-activated protein kinase SLT2/MPK1	0.592355	5.06e-08
P33302	Pleiotropic ABC efflux transporter of multiple drugs	0.398522	5.08e-08
P31688	Trehalose-phosphatase	0.707788	5.32e-08
Q12377	26S proteasome regulatory subunit RPN6	0.95235	5.46e-08
P12385	Eukaryotic peptide chain release factor subunit 1	0.458571	5.82e-08
P53865	Chaotic nuclear migration protein 67	0.433887	5.9e-08
Q02866	Protein MUK1	0.726294	5.95e-08
P38755	Oxysterol-binding protein homolog 7	0.720954	6.22e-08
P38910	10 kDa heat shock protein, mitochondrial	-1.10852	6.34e-08
P33334	Pre-mRNA-splicing factor 8	0.209235	6.42e-08
P36090	Uncharacterized protein ANR2	0.483891	6.46e-08
P48527	Tyrosine--tRNA ligase, mitochondrial	-0.549921	6.46e-08
P20485	Choline kinase	0.526292	6.64e-08
Q99257	mRNA export factor MEX67	0.599333	6.76e-08
Q04172	Sensitive to high expression protein 9, mitochondrial	-1.03426	6.76e-08
P53973	Histone deacetylase HDA1	0.718651	6.86e-08
P37292	Serine hydroxymethyltransferase, mitochondrial	0.488545	7.12e-08
Q03306	Serine/threonine-protein kinase PKH3	0.631047	7.33e-08
P39954	Adenosylhomocysteinase	-0.718108	7.37e-08
P39940	E3 ubiquitin-protein ligase RSP5	0.535162	7.86e-08
P32264	Glutamate 5-kinase	0.710801	7.87e-08
P47079	T-complex protein 1 subunit theta	0.932452	8.3e-08
P39076	T-complex protein 1 subunit beta	0.623557	8.74e-08
Q08962	60S ribosome subunit biogenesis protein NIP7	0.802185	9.19e-08
P21372	Pre-mRNA-processing ATP-dependent RNA helicase PRP5	0.439779	1.03e-07
P25303	DnaJ-related protein SCJ1	0.730483	1.03e-07
P40457	Protein MLP2	0.63634	1.05e-07
Q08421	Enhancer of translation termination 1	0.918546	1.05e-07
P34243	DNA polymerase alpha-associated DNA helicase A	0.678413	1.05e-07
P23255	Transcription initiation factor TFIID subunit 2	0.615215	1.11e-07
Q04373	Pumilio homology domain family member 6	0.687762	1.13e-07
P33767	Dolichyl-diphosphooligosaccharide--protein glycosyltransferase subunit WBP1	0.451729	1.15e-07
Q03048	Cofilin	-2.01133	1.16e-07
P19358	S-adenosylmethionine synthase 2	0.851203	1.22e-07
P48524	Ubiquitin ligase-binding protein BUL1	0.82409	1.22e-07
P38626	NADH-cytochrome b5 reductase 1	0.532626	1.23e-07
P38089	Protein phosphatase 2C homolog 4	0.724685	1.24e-07
P13186	Serine/threonine-protein kinase KIN2	0.45894	1.24e-07
P89102	Exocyst complex component SEC5	0.390634	1.29e-07
P46951	Cargo-transport protein YPP1	0.853664	1.31e-07
Q06833	Nucleus-vacuole junction protein 2	0.704729	1.31e-07
P40339	Replication factor C subunit 4	0.629081	1.36e-07
P20053	U4/U6 small nuclear ribonucleoprotein PRP4	0.715184	1.37e-07
P20484	Protein MAK11	0.542725	1.38e-07
P25342	Cell division control protein 10	0.59439	1.38e-07
P33298	26S proteasome regulatory subunit 6B homolog	0.695026	1.54e-07
P30619	Protein transport protein SEC1	0.953064	1.54e-07
P22147	5'-3' exoribonuclease 1	0.618169	1.6e-07
P06738	Glycogen phosphorylase	0.732728	1.64e-07
Q05892	MIOREX complex component 2	0.71347	1.68e-07
Q99287	Protein SEY1	0.785734	1.69e-07
Q12412	Protein PNS1	0.883355	1.75e-07
P08425	Phenylalanine--tRNA ligase, mitochondrial	-0.574482	1.76e-07
P39535	Low-affinity phosphate transporter PHO90	0.74699	1.79e-07
P40368	Nucleoporin NUP82	0.3164	1.84e-07
P13185	Serine/threonine protein kinase KIN1	0.77355	1.86e-07
P28777	Chorismate synthase	0.715713	1.86e-07
Q08235	Ribosome biogenesis protein BRX1	1.0599	2.03e-07
P25336	DNA mismatch repair protein MSH3	0.619455	2.05e-07
Q12250	26S proteasome regulatory subunit RPN5	0.473141	2.14e-07
P36775	Lon protease homolog, mitochondrial	-1.12694	2.23e-07
Q08924	Regulator of Ty1 transposition protein 10	0.566468	2.26e-07
P53235	Eukaryotic translation initiation factor 2A	0.49917	2.31e-07
P38013	Peroxiredoxin AHP1	-0.859768	2.42e-07
P38151	PAB1-binding protein 2	0.726625	2.43e-07
P00931	Tryptophan synthase	0.253846	2.48e-07
Q05779	Ubiquinone biosynthesis protein COQ9, mitochondrial	0.972496	2.54e-07
P38321	Uncharacterized protein YBR225W	0.135612	2.74e-07
Q05567	Sphingosine-1-phosphate lyase	0.607445	2.78e-07
P19262	Dihydrolipoyllysine-residue succinyltransferase component of 2-oxoglutarate dehydrogenase complex, mitochondrial	0.541407	2.86e-07
Q03497	Serine/threonine-protein kinase STE20	0.297522	2.96e-07
P37898	Alanine/arginine aminopeptidase	-0.70532	3.04e-07
Q99299	Altered inheritance of mitochondria protein 44	-0.471564	3.11e-07
P46655	Glutamate--tRNA ligase, cytoplasmic	0.231628	3.19e-07
P16664	Guanine nucleotide exchange factor subunit RGP1	0.864109	3.22e-07
P25360	Inorganic phosphate transporter PHO87	0.611283	3.27e-07
P40317	Protein SOK1	0.706722	3.31e-07
Q07896	Nucleolar complex-associated protein 3	0.34114	3.31e-07
Q02724	Ubiquitin-like-specific protease 1	0.578959	3.42e-07
P12683	3-hydroxy-3-methylglutaryl-coenzyme A reductase 1	0.959376	3.42e-07
P09436	Isoleucine--tRNA ligase, cytoplasmic	0.166521	3.66e-07
P22209	Serine/threonine-protein kinase KIN3	1.04834	3.71e-07
P38254	Probable tubulin--tyrosine ligase PBY1	0.252586	3.73e-07
Q03735	RNA-binding protein NAB6	0.509125	3.82e-07
P00830	ATP synthase subunit beta, mitochondrial	0.462801	3.91e-07
P09798	Anaphase-promoting complex subunit CDC16	0.473871	3.91e-07
P39517	ATP-dependent RNA helicase DHH1	0.390966	3.91e-07
P38132	DNA replication licensing factor MCM7	0.56216	4e-07
P31384	CCR4-Not complex 3'-5'-exoribonuclease subunit Ccr4	0.47174	4.17e-07
P32356	Cytosolic neutral trehalase	0.686446	4.21e-07
P47129	Assembly-complementing factor 4	0.685267	4.28e-07
Q06631	Protein BFR2	0.698197	4.36e-07
P40469	DNA repair/transcription protein MET18/MMS19	0.962773	4.38e-07
P40970	Serine palmitoyltransferase 2	0.640977	4.4e-07
P03965	Carbamoyl-phosphate synthase arginine-specific large chain	0.654535	4.42e-07
P32492	Myosin-4	0.614648	4.43e-07
P40215	External NADH-ubiquinone oxidoreductase 1, mitochondrial	0.521204	4.44e-07
Q12460	Nucleolar protein 56	0.291103	4.48e-07
P17442	Phosphate system positive regulatory protein PHO81	0.476796	4.61e-07
P53119	E3 ubiquitin-protein ligase HUL5	0.706207	4.61e-07
Q08226	Protein CRT10	1.03939	4.62e-07
P39009	DNA damage response protein kinase DUN1	0.450828	4.89e-07
P06773	Deoxycytidylate deaminase	1.20683	5.12e-07
P32608	Retrograde regulation protein 2	0.434716	5.12e-07
Q04048	Pre-mRNA-splicing factor SYF1	0.71807	5.14e-07
P32074	Coatomer subunit gamma	0.75598	5.24e-07
P38798	Nonsense-mediated mRNA decay protein 2	0.646117	5.24e-07
P00445	Superoxide dismutase [Cu-Zn]	-1.97495	5.3e-07
Q06078	U3 small nucleolar RNA-associated protein 21	0.302867	5.31e-07
P40164	Serine/threonine-protein phosphatase 4 regulatory subunit 3	1.80709	5.43e-07
P53206	Putative mitochondrial cysteine synthase	1.1022	5.44e-07
P53734	ATP-dependent RNA helicase DBP6	0.644171	5.51e-07
P06242	Serine/threonine-protein kinase KIN28	0.534701	5.56e-07
P06105	Protein SCP160	0.336173	5.71e-07
P53877	Pre-rRNA-processing protein IPI3	0.72001	5.71e-07
P41832	Protein BNI1	0.649019	6e-07
P40159	Uncharacterized protein YNL208W	1.00164	6.06e-07
P39013	Actin cytoskeleton-regulatory complex protein END3	0.499147	6.31e-07
Q06629	HDA1 complex subunit 2	0.576516	6.76e-07
P22204	Cell cycle protein kinase DBF2	0.74712	6.78e-07
P27692	Transcription elongation factor SPT5	0.408691	7.1e-07
P23561	Serine/threonine-protein kinase STE11	0.700797	7.21e-07
P38235	Uncharacterized protein YBR053C	-1.73902	7.21e-07
Q12179	Uncharacterized protein YPL245W	0.691889	7.26e-07
Q06211	E3 ubiquitin-protein ligase linker protein MMS1	0.910661	7.31e-07
P36120	ATP-dependent RNA helicase DBP7	0.807557	7.37e-07
P09950	5-aminolevulinate synthase, mitochondrial	0.712623	7.64e-07
Q02805	Protein ROD1	0.974348	7.64e-07
P53946	Actin-related protein 5	0.535483	7.67e-07
Q99207	Nucleolar complex protein 14	0.489874	7.71e-07
P38251	Replication factor C subunit 5	0.736304	8.05e-07
P25045	Serine palmitoyltransferase 1	0.692032	8.25e-07
P40012	Protoporphyrinogen oxidase	0.406705	8.8e-07
P08018	MAP kinase kinase PBS2	0.397096	9.28e-07
P36007	L-threo-3-hydroxyaspartate ammonia-lyase	1.1717	9.34e-07
P07703	DNA-directed RNA polymerases I and III subunit RPAC1	0.64637	9.49e-07
Q12136	Something about silencing protein 10	0.82704	9.67e-07
Q12159	RNA annealing protein YRA1	0.566152	1.01e-06
P36151	Uncharacterized protein YKR070W	0.572682	1.02e-06
P15873	Proliferating cell nuclear antigen	-0.915896	1.02e-06
P22213	Protein SLY1	0.0793199	1.03e-06
P14242	DNA mismatch repair protein PMS1	0.578794	1.08e-06
P16649	General transcriptional corepressor TUP1	-0.767091	1.08e-06
P36124	SET domain-containing protein 3	0.933463	1.09e-06
Q01080	DNA-directed RNA polymerase I subunit RPA49	1.11941	1.12e-06
P53920	Pro-apoptotic serine protease NMA111	0.284062	1.15e-06
P40302	Proteasome subunit alpha type-6	0.725345	1.15e-06
P30822	Exportin-1	0.678501	1.19e-06
P53549	26S proteasome subunit RPT4	0.792995	1.2e-06
Q03532	ATP-dependent RNA helicase HAS1	0.686427	1.2e-06
P48360	Probable NADPH:adrenodoxin oxidoreductase, mitochondrial	0.591922	1.21e-06
Q08281	Restriction of telomere capping protein 1	0.603033	1.21e-06
P40061	Target of rapamycin complex 2 subunit TSC11	0.628477	1.21e-06
P25573	Mitochondrial inner membrane i-AAA protease supercomplex subunit MGR1	0.510466	1.24e-06
P32191	Glycerol-3-phosphate dehydrogenase, mitochondrial	0.270993	1.25e-06
P38011	Small ribosomal subunit protein RACK1	0.652333	1.26e-06
Q08162	Exosome complex exonuclease DIS3	0.0292959	1.29e-06
P38961	25S rRNA (adenine(645)-N(1))-methyltransferase	0.475663	1.3e-06
Q12024	Ribosome biogenesis protein YTM1	0.340153	1.31e-06
Q12152	Putative serine/threonine-protein kinase YPL150W	0.582554	1.33e-06
P53866	Protein SQS1	0.573292	1.36e-06
P12612	T-complex protein 1 subunit alpha	0.444801	1.37e-06
P24482	DNA polymerase epsilon subunit B	0.729249	1.37e-06
Q04600	Translation machinery-associated protein 64	0.77203	1.37e-06
P14907	Nucleoporin NSP1	0.234257	1.39e-06
P20424	Signal recognition particle subunit SRP54	0.36393	1.39e-06
P40531	Protein GVP36	-0.375573	1.49e-06
P20449	ATP-dependent RNA helicase DBP5	0.643254	1.51e-06
P38989	Structural maintenance of chromosomes protein 2	0.696857	1.51e-06
P42842	Essential for maintenance of the cell wall protein 1	2.22345	1.51e-06
Q08208	Nucleolar protein 12	0.561758	1.52e-06
Q08446	Protein SGT1	0.719054	1.54e-06
P38333	Essential nuclear protein 1	0.514424	1.59e-06
Q02931	NET1-associated nuclear protein 1	0.323606	1.67e-06
P38085	Valine/tyrosine/tryptophan amino-acid permease 1	0.376863	1.76e-06
P00546	Cyclin-dependent kinase 1	0.396196	1.81e-06
P41819	Dimethyladenosine transferase	0.542545	1.84e-06
P53965	Inositol phosphatase SIW14	0.826334	1.85e-06
P33202	Ubiquitin fusion degradation protein 4	0.101563	1.86e-06
P38692	Serine/threonine-protein kinase KIC1	0.780852	1.87e-06
P19882	Heat shock protein 60, mitochondrial	-0.332862	1.9e-06
Q07468	Vacuolar morphogenesis protein 6	0.0757037	1.91e-06
Q12176	Ribosome biogenesis protein MAK21	0.870652	1.91e-06
P38792	Exosome complex component RRP4	0.23298	1.95e-06
P25586	KRR1 small subunit processome component	0.577994	1.95e-06
P38523	GrpE protein homolog, mitochondrial	-0.569266	1.95e-06
P53691	Peptidyl-prolyl cis-trans isomerase CPR6	0.751662	1.98e-06
P53063	Decapping nuclease RAI1	0.712268	2.14e-06
P46944	Trafficking protein particle complex III-specific subunit 85	0.588954	2.15e-06
P53264	Cardiolipin-specific deacylase 1, mitochondrial	1.02374	2.18e-06
P50107	Glyoxalase I	0.722777	2.21e-06
P26321	Large ribosomal subunit protein uL18	0.443851	2.23e-06
Q07878	Intermembrane lipid transfer protein VPS13	-0.0503523	2.24e-06
P25623	Suppressor of yeast profilin deletion	0.639252	2.3e-06
P04801	Threonine--tRNA ligase, cytoplasmic	0.512357	2.44e-06
Q03714	U1 SNP1-associating protein 1	0.461791	2.45e-06
Q12374	Nuclear control of ATPase protein 2	0.618764	2.51e-06
P40515	Mitochondrial fission 1 protein	0.67175	2.51e-06
P00560	Phosphoglycerate kinase	0.527363	2.56e-06
P40098	Uncharacterized mitochondrial membrane protein FMP10	-0.553965	2.59e-06
P40416	Iron-sulfur clusters transporter ATM1, mitochondrial	0.669609	2.59e-06
P50101	Ubiquitin carboxyl-terminal hydrolase 15	0.663024	2.62e-06
P40494	Actin-regulating kinase PRK1	0.468722	2.67e-06
P14906	Protein translocation protein SEC63	0.333486	2.85e-06
Q06567	ABC1 family protein MCP2	-0.57168	2.89e-06
P54781	C-22 sterol desaturase ERG5	0.289871	2.92e-06
P50079	SVP1-like protein 2	0.759801	2.95e-06
Q03758	Ubiquitin ligase-binding protein BUL2	-0.105852	2.98e-06
P36022	Dynein heavy chain, cytoplasmic	0.572732	3.01e-06
Q12404	Protein disulfide-isomerase MPD1	1.12864	3.01e-06
P38427	Trehalose synthase complex regulatory subunit TSL1	0.601809	3.03e-06
P34756	1-phosphatidylinositol 3-phosphate 5-kinase FAB1	0.540159	3.09e-06
P53104	Serine/threonine-protein kinase ATG1	0.839878	3.39e-06
P29029	Endochitinase	-1.52084	3.45e-06
Q08217	Serine/threonine-protein kinase PSK2	0.801813	3.53e-06
P50077	Calcium-channel protein CCH1	0.293523	3.54e-06
Q12331	FAS1 domain-containing protein YDR262W	0.907566	3.56e-06
P53388	Dicarboxylic amino acid permease	0.490674	3.57e-06
P38833	Uncharacterized protein YHR127W	1.06855	3.62e-06
Q06407	Rho-type GTPase-activating protein 2	0.724497	3.63e-06
P33332	Exocyst complex component SEC3	0.189782	3.73e-06
P47143	Adenosine kinase	-2.25566	3.79e-06
P40453	Ubiquitin carboxyl-terminal hydrolase 7	0.323348	3.9e-06
P32896	Protein PDC2	0.647892	4.07e-06
Q06132	Suppressor of glycerol defect protein 1	0.699333	4.13e-06
Q12283	Malonyl CoA-acyl carrier protein transacylase, mitochondrial	0.372097	4.15e-06
P32333	TATA-binding protein-associated factor MOT1	0.466781	4.21e-06
Q06408	Transaminated amino acid decarboxylase	0.957389	4.22e-06
P48412	Nonsense-mediated mRNA decay protein 3	0.235418	4.34e-06
P13663	Aspartate-semialdehyde dehydrogenase	-0.443427	4.45e-06
P40016	26S proteasome regulatory subunit RPN3	0.474533	4.48e-06
P06243	Cell division control protein 7	0.815791	4.55e-06
P53094	Negative regulator of sporulation MDS3	0.610361	4.58e-06
P53167	tRNA pseudouridine(27/28) synthase	0.609902	4.67e-06
P29469	DNA replication licensing factor MCM2	0.492458	4.67e-06
P20795	Vacuolar protein sorting-associated protein 33	0.694443	4.71e-06
Q02939	General transcription and DNA repair factor IIH subunit TFB2	0.489685	4.71e-06
P39944	Ubiquitin carboxyl-terminal hydrolase 5	0.452205	4.79e-06
P40345	Phospholipid:diacylglycerol acyltransferase	0.527628	4.79e-06
P37838	Nucleolar protein 4	0.502199	5.02e-06
P47057	Sorting nexin-4	0.535326	5.07e-06
P50109	Protein PSP2	0.215784	5.24e-06
P47069	Spindle pole body assembly component MPS3	0.32886	5.33e-06
P42846	Protein KRI1	0.590606	5.56e-06
P25719	Peptidyl-prolyl cis-trans isomerase C, mitochondrial	-1.12922	5.56e-06
Q05518	Protein PAL1	0.175444	5.79e-06
P40050	MIOREX complex component 1	0.483412	5.83e-06
Q12069	tRNA pseudouridine(32) synthase, mitochondrial	1.11285	5.83e-06
P29295	Casein kinase I homolog HRR25	0.546466	5.86e-06
P41277	Glycerol-1-phosphate phosphohydrolase 1	0.497313	5.91e-06
P33204	Actin-related protein 2/3 complex subunit 4	0.923262	6.01e-06
P48231	Tricalbin-2	0.611006	6.13e-06
P39985	rDNA transcriptional regulator POL5	0.568025	6.54e-06
P04046	Amidophosphoribosyltransferase	0.774124	6.69e-06
Q02785	ATP-dependent permease PDR12	-0.2977	6.69e-06
Q08287	60S ribosome subunit biogenesis protein NOP8	0.731176	6.74e-06
P18496	Mitochondrial ATPase complex subunit ATP10	0.52575	6.85e-06
Q08723	26S proteasome regulatory subunit RPN8	0.399735	6.85e-06
Q01329	Pre-tRNA-processing protein PTA1	0.791546	6.99e-06
P46674	Nuclear mRNA export protein SAC3	0.311151	7e-06
P40529	ADP-ribosylation factor GTPase-activating protein effector protein 2	0.583551	7.33e-06
Q12446	Proline-rich protein LAS17	0.585769	7.37e-06
P53849	Zinc finger protein GIS2	0.592787	7.47e-06
P25569	Glucose-induced degradation protein 7	0.193406	7.49e-06
P39105	Lysophospholipase 1	0.6684	7.68e-06
P47136	Bud site selection protein 4	0.605782	7.75e-06
P38124	Fluconazole resistance protein 1	1.95674	7.86e-06
P38822	Protein BZZ1	0.840925	7.92e-06
P53170	[Pyruvate dehydrogenase (acetyl-transferring)] kinase 2, mitochondrial	1.28998	7.98e-06
P46956	Inorganic phosphate transporter PHO86	0.637958	8.07e-06
Q07834	KH domain-containing protein YLL032C	0.374481	8.28e-06
P39007	Dolichyl-diphosphooligosaccharide--protein glycosyltransferase subunit STT3	0.497286	8.4e-06
P38261	Exocyst complex component EXO84	0.272131	8.48e-06
Q05946	U3 small nucleolar RNA-associated protein 13	0.452506	8.59e-06
P12868	E3 ubiquitin-protein ligase PEP5	0.522452	8.78e-06
P40340	ATPase histone chaperone YTA7	0.667369	8.78e-06
P36017	Vacuolar protein sorting-associated protein 21	0.572315	8.99e-06
P53252	Sphingolipid long chain base-responsive protein PIL1	0.271022	9.37e-06
P22137	Clathrin heavy chain	0.332105	9.65e-06
Q07478	ATP-dependent RNA helicase SUB2	0.284802	9.79e-06
Q07843	Increased recombination centers protein 19	0.918892	9.92e-06
P47112	Cell division cycle protein CDT1	0.816729	1.04e-05
P53276	U3 small nucleolar RNA-associated protein 8	0.542953	1.04e-05
P25040	20S rRNA accumulation protein 4	1.05939	1.05e-05
Q06512	Nucleolar complex protein 4	1.15602	1.09e-05
Q06350	Sporulation-specific chitinase 2	0.52051	1.1e-05
P33734	Imidazole glycerol phosphate synthase hisHF	-0.457133	1.11e-05
Q12043	Triacylglycerol lipase 5	0.735068	1.12e-05
P05317	Large ribosomal subunit protein uL10	0.668715	1.13e-05
P33314	Inhibitory regulator protein BUD2/CLA2	0.742566	1.18e-05
Q08685	mRNA cleavage and polyadenylation factor CLP1	0.343419	1.2e-05
P39682	Pre-mRNA-processing factor 39	0.597455	1.21e-05
Q12449	Hsp90 co-chaperone AHA1	0.55506	1.23e-05
P49956	Chromosome transmission fidelity protein 18	1.01905	1.23e-05
P38766	ATP-dependent DNA helicase RRM3	0.971303	1.25e-05
P38137	Oxalate--CoA ligase	0.413377	1.26e-05
Q08562	ATP-dependent helicase ULS1	0.9266	1.27e-05
Q05933	Actin-related protein 2/3 complex subunit 3	0.801386	1.27e-05
P28273	5-oxoprolinase	0.324351	1.28e-05
P19263	Mediator of RNA polymerase II transcription subunit 14	0.327296	1.29e-05
P23394	Pre-mRNA-splicing ATP-dependent RNA helicase PRP28	0.658096	1.29e-05
Q03281	Inner nuclear membrane protein HEH2	0.442416	1.3e-05
P23643	Vacuolar protein sorting-associated protein 3	0.773021	1.33e-05
P32330	2-deoxy-glucose resistant protein 2	0.496649	1.36e-05
P33327	NAD-specific glutamate dehydrogenase	0.474356	1.37e-05
P38788	Ribosome-associated complex subunit SSZ1	0.522951	1.37e-05
P42073	RNA end formation protein 2	0.815758	1.38e-05
P11154	Pyruvate carboxylase 1	1.03789	1.4e-05
P46680	Actin-interacting protein 1	-0.28734	1.4e-05
P25617	Uncharacterized protein YCR016W	0.911021	1.41e-05
Q02455	Protein MLP1	0.466483	1.42e-05
P10659	S-adenosylmethionine synthase 1	0.561558	1.44e-05
Q06218	ATP-dependent RNA helicase DBP9	0.785536	1.44e-05
Q12452	3-keto-steroid reductase ERG27	0.407095	1.44e-05
P0CX55;P0CX56	Small ribosomal subunit protein uS13A;Small ribosomal subunit protein uS13B	1.72931	1.45e-05
P32893	Trafficking protein particle complex II-specific subunit 65	0.508448	1.47e-05
Q06708	Vacuole morphology and inheritance protein 14	0.522817	1.47e-05
P30771	ATP-dependent helicase NAM7	0.551092	1.52e-05
P32266	Dynamin-like GTPase MGM1, mitochondrial	0.583881	1.52e-05
Q08204	Structural maintenance of chromosomes protein 5	0.253142	1.53e-05
P53191	Glutamine sensor PIB2	0.607184	1.53e-05
Q03337	Trafficking protein particle complex subunit 31	0.833581	1.54e-05
P32464	Protein HYM1	1.0283	1.56e-05
P38779	Proteasome-interacting protein CIC1	0.355122	1.59e-05
P47051	Putative lipoate-protein ligase A	0.486021	1.6e-05
P47050	Cullin-8	0.739424	1.6e-05
P36119	RQC trigger complex subunit RQT4	0.944043	1.7e-05
Q04748	Protein SOV1, mitochondrial	0.514759	1.76e-05
Q03899	F-box protein YDR131C	0.684423	1.77e-05
P40987	Chromosome instability protein 1	0.627078	1.78e-05
Q12429	Diphthine--ammonia ligase	0.556807	1.8e-05
P36101	tRNA threonylcarbamoyladenosine dehydratase 2	0.545156	1.81e-05
P24384	Pre-mRNA-splicing factor ATP-dependent RNA helicase PRP22	0.783161	1.84e-05
P21375	Fumarate reductase 2	0.574183	1.86e-05
P53917	Factor arrest protein 11	0.473743	1.86e-05
P36130	CCR4-associated factor 4	0.787887	1.9e-05
P32457	Cell division control protein 3	0.265448	1.99e-05
P50089	Uncharacterized protein YGR237C	0.554291	2.02e-05
P53879	GTP-binding protein RHO5	0.517005	2.02e-05
P53250	Twinfilin-1	0.552567	2.02e-05
Q04491	Protein transport protein SEC13	0.276094	2.08e-05
P53722	Mitochondrial inner membrane protease ATP23	-0.575207	2.1e-05
Q04279	Eisosome protein SEG1	0.675156	2.1e-05
P38768	Protein interacting with Hsp90 1	0.67086	2.14e-05
P53202	Cullin-3	1.02516	2.14e-05
Q07528	Autophagy-related protein 20	0.217735	2.14e-05
P39935	Eukaryotic initiation factor 4F subunit p150	0.351504	2.2e-05
P07866	Guanine nucleotide exchange factor LTE1	0.308093	2.22e-05
P39955	Protein SAP1	0.378154	2.22e-05
P06784	Serine/threonine-protein kinase STE7	0.881729	2.24e-05
P53898	Protein NSG2	0.384525	2.25e-05
P38800	Membrane-anchored lipid-binding protein LAM4	0.429222	2.27e-05
P53200	Protein-lysine N-methyltransferase EFM5	0.37739	2.27e-05
Q03525	Protein TMA23	0.711431	2.35e-05
P43633	Serine/threonine-protein kinase Haspin homolog ALK1	1.04568	2.38e-05
P46950	Nitrosoguanidine resistance protein SNG1	1.18028	2.41e-05
P22135	Protein ATP12, mitochondrial	-0.782346	2.43e-05
P07246	Alcohol dehydrogenase 3, mitochondrial	0.548317	2.47e-05
P38687	Signal recognition particle subunit SRP68	0.621244	2.47e-05
P46151	Methylenetetrahydrofolate reductase 1	0.328699	2.47e-05
P0C0W1;Q3E7Y3	Small ribosomal subunit protein uS8A;Small ribosomal subunit protein uS8B	0.675742	2.48e-05
P07258	Carbamoyl-phosphate synthase arginine-specific small chain	0.989392	2.52e-05
P37303	Low specificity L-threonine aldolase	0.239267	2.58e-05
P35735	Protein SFK1	0.701227	2.59e-05
P32501	Translation initiation factor eIF-2B subunit epsilon	0.590441	2.6e-05
P06786	DNA topoisomerase 2	0.536887	2.62e-05
P15938	Pre-mRNA-splicing factor ATP-dependent RNA helicase PRP16	0.721007	2.63e-05
P38790	Hydroxyacyl-thioester dehydratase type 2, mitochondrial	0.941422	2.63e-05
P09938	Ribonucleoside-diphosphate reductase small chain 1	-0.585802	2.64e-05
P32860	NifU-like protein, mitochondrial	0.477306	2.74e-05
P05750	Small ribosomal subunit protein uS3	0.66849	2.78e-05
P38998	Saccharopine dehydrogenase [NAD(+), L-lysine-forming]	0.37106	2.83e-05
Q03516	Uncharacterized protein RSN1	0.642466	2.89e-05
P53297	PAB1-binding protein 1	0.239732	2.91e-05
Q08096	RNA 3'-terminal phosphate cyclase-like protein	0.542336	2.94e-05
Q08886	Guanine nucleotide-binding protein subunit beta 1	0.763271	2.94e-05
P46971	Dolichyl-phosphate-mannose--protein mannosyltransferase 4	0.365601	2.96e-05
P18480	SWI/SNF chromatin-remodeling complex subunit SNF5	0.206792	2.98e-05
P40825	Alanine--tRNA ligase, mitochondrial	0.364713	2.99e-05
P50875	Transcription factor SPT20	0.763759	3e-05
Q99332	Protein HPH1	0.741339	3.01e-05
P28743	Kinesin-like protein KIP2	0.683949	3.04e-05
P50273	Mitochondrial translation factor ATP22	0.369189	3.06e-05
P22134	DNA-3-methyladenine glycosylase	0.682645	3.17e-05
P38840	Aromatic amino acid aminotransferase 2	0.393926	3.24e-05
P39104	Phosphatidylinositol 4-kinase PIK1	0.557516	3.24e-05
Q06344	Pre-rRNA-processing protein ESF1	0.61579	3.24e-05
P0CX41;P0CX42	Large ribosomal subunit protein uL14A;Large ribosomal subunit protein uL14B	0.162619	3.26e-05
P40318	ERAD-associated E3 ubiquitin-protein ligase DOA10	0.390834	3.27e-05
Q08236	Target of rapamycin complex 2 subunit AVO1	0.783537	3.27e-05
Q03713	Respiratory supercomplex factor 1, mitochondrial	-0.514247	3.29e-05
P22943	12 kDa heat shock protein	-3.12802	3.31e-05
P23301	Eukaryotic translation initiation factor 5A-1	0.957633	3.33e-05
P08679	Citrate synthase, peroxisomal	0.691597	3.37e-05
P53169	YAP1-binding protein 2	1.01768	3.42e-05
Q07381	Ribosome biogenesis protein TSR1	0.728776	3.6e-05
Q12220	U3 small nucleolar RNA-associated protein 12	0.553517	3.63e-05
Q12080	Ribosome biogenesis protein NOP53	0.100015	3.67e-05
P04821	Cell division control protein 25	0.442588	3.67e-05
Q06321	Sterol 3-beta-glucosyltransferase	1.1377	3.69e-05
P32590	Heat shock protein homolog SSE2	1.8546	3.71e-05
Q12372	S-methylmethionine permease 1	0.889464	3.75e-05
P08593	Protein MSS18	0.777682	3.78e-05
P38931	Mediator of RNA polymerase II transcription subunit 13	0.93017	3.78e-05
P07275	Delta-1-pyrroline-5-carboxylate dehydrogenase, mitochondrial	0.597156	3.85e-05
P33297	26S proteasome regulatory subunit 6A	0.43644	3.91e-05
P25037	Ubiquitin carboxyl-terminal hydrolase 1	0.322756	3.98e-05
P23639	Proteasome subunit alpha type-2	0.703639	4e-05
P32589	Heat shock protein homolog SSE1	0.831665	4.02e-05
P48236	Glycerophosphocholine acyltransferase 1	0.441722	4.12e-05
P38314	Protein SDS24	1.63823	4.2e-05
P28241	Isocitrate dehydrogenase [NAD] subunit 2, mitochondrial	0.818944	4.29e-05
P53860	Phosphatidylinositol transfer protein PDR16	0.611236	4.29e-05
Q12259	BTB/POZ domain-containing protein YLR108C	0.830706	4.46e-05
P32361	Serine/threonine-protein kinase/endoribonuclease IRE1	0.825122	4.56e-05
P47135	Protein JSN1	0.605221	4.57e-05
Q04867	Putative methyltransferase YMR310C	1.11205	4.6e-05
Q12476	Protein AIR2	0.993664	4.65e-05
P40325	Proline-rich protein HUA1	0.992686	4.71e-05
Q12102	Cleavage factor two protein 2	0.45734	4.72e-05
Q12504	Ribosomal lysine N-methyltransferase 4	0.489488	4.72e-05
P14832	Peptidyl-prolyl cis-trans isomerase	-1.05587	4.79e-05
Q07651	SUR7 family protein FMP45	1.70988	4.79e-05
P53889	Uncharacterized mitochondrial hydrolase FMP41	0.589869	4.79e-05
P33441	THO complex subunit MFT1	0.40502	4.83e-05
P0CX35;P0CX36	Small ribosomal subunit protein eS4A;Small ribosomal subunit protein eS4B	0.395883	4.84e-05
P27515	Uridine kinase	0.646935	5.15e-05
P52910	Acetyl-coenzyme A synthetase 2	0.251188	5.18e-05
P15992	Heat shock protein 26	0.563579	5.2e-05
Q03897	Maintenance of telomere capping protein 5	0.973666	5.24e-05
P08524	Farnesyl pyrophosphate synthase	-0.725628	5.24e-05
P25367	[PIN+] prion protein RNQ1	0.566217	5.27e-05
P38828	Protein LSM12	0.703549	5.44e-05
P38820	Adenylyltransferase and sulfurtransferase UBA4	0.313331	5.62e-05
Q12063	Dehydrodolichyl diphosphate synthase complex subunit NUS1	0.281477	5.62e-05
Q12252	Phosphate metabolism protein 7	1.27588	5.67e-05
Q12469	Serine/threonine-protein kinase SKM1	1.78349	5.68e-05
P06245	cAMP-dependent protein kinase type 2	0.675035	5.76e-05
Q02795	Dolichyl-diphosphooligosaccharide--protein glycosyltransferase subunit SWP1	0.348802	5.79e-05
P40956	Protein GTS1	0.549478	5.8e-05
Q12746	Plasma membrane-associated coenzyme Q6 reductase PGA3	0.404508	5.88e-05
P43613	ER-localized J domain-containing protein 5	0.569152	5.89e-05
P40433	6-phosphofructo-2-kinase 1	0.459369	5.89e-05
P52891	Nucleoporin NUP84	-0.014103	5.94e-05
P33751	Flavin prenyltransferase PAD1, mitochondrial	0.846504	6.09e-05
Q08817	Leucine-rich repeat-containing protein SOG2	0.843104	6.19e-05
P38959	Vacuolar protein sorting-associated protein 41	0.816109	6.23e-05
P16521	Elongation factor 3A	0.271138	6.33e-05
P15646	rRNA 2'-O-methyltransferase fibrillarin	0.776116	6.34e-05
P35183	Protein AST1	0.766678	6.37e-05
P32899	U3 small nucleolar ribonucleoprotein protein IMP3	0.765413	6.51e-05
P38793	tRNA (guanine(37)-N1)-methyltransferase	0.990081	6.57e-05
P53088	Cytoplasmic tRNA 2-thiolation protein 1	0.535211	6.57e-05
Q08951	AP-3 complex subunit delta	0.640844	6.57e-05
Q04228	UBX domain-containing protein 2	0.519866	6.57e-05
Q04170	Uncharacterized protein YDR391C	0.881448	6.82e-05
P21560	Protein CBP3, mitochondrial	-0.518959	6.85e-05
P09064	Eukaryotic translation initiation factor 2 subunit beta	0.726731	6.96e-05
P39525	3-oxoacyl-[acyl-carrier-protein] synthase homolog	0.695173	6.97e-05
P08465	Homoserine O-acetyltransferase	1.08073	7.09e-05
P16522	Anaphase-promoting complex subunit CDC23	0.555017	7.12e-05
P43616	Cys-Gly metallodipeptidase DUG1	-0.692876	7.21e-05
P53238	Peflin	0.512495	7.23e-05
P09232	Cerevisin	0.499436	7.23e-05
P36112	MICOS complex subunit MIC60	0.526126	7.32e-05
P53215	tRNA(His) guanylyltransferase	0.459325	7.49e-05
Q3E6R5	Uncharacterized mitochondrial outer membrane protein YDR381C-A	-0.813881	7.6e-05
Q08484	GTPase-activating protein GYP1	0.550629	7.62e-05
P32477	Glutamate--cysteine ligase	0.856801	7.73e-05
P53859	Exosome complex component CSL4	0.48828	7.73e-05
Q02256	Tyrosine-protein phosphatase YVH1	0.281238	7.81e-05
P22146	1,3-beta-glucanosyltransferase GAS1	0.737319	8.17e-05
P39936	Eukaryotic initiation factor 4F subunit p130	0.941143	8.21e-05
Q05583	Cytosolic iron-sulfur protein assembly protein 1	0.646161	8.26e-05
P32895	Ribose-phosphate pyrophosphokinase 1	0.525195	8.27e-05
Q08237	RNA exonuclease 4	0.4926	8.27e-05
Q00776	AP-1 complex subunit mu-1-I	0.356884	8.3e-05
P40530	[Pyruvate dehydrogenase (acetyl-transferring)] kinase 1, mitochondrial	0.6744	8.33e-05
Q12358	Alpha-ketoglutarate-dependent sulfonate dioxygenase	0.590419	8.35e-05
P40362	U3 small nucleolar RNA-associated protein 18	0.595355	8.44e-05
P23542	Aspartate aminotransferase, cytoplasmic	0.247976	8.58e-05
P53974	Actin-regulating kinase 1	1.14861	8.58e-05
P32335	Protein MSS51, mitochondrial	-0.234895	8.64e-05
P40547	Vacuolar import and degradation protein 28	0.752024	8.66e-05
Q03496	tRNA (cytidine(32)-2'-O)-methyltransferase non-catalytic subunit TRM732	1.00775	8.73e-05
P54003	Protein SUR7	0.551065	8.76e-05
P38746	Obg-like ATPase homolog	-0.486095	8.95e-05
P46677	Transcription initiation factor TFIID subunit 1	0.277013	9.1e-05
P10081	ATP-dependent RNA helicase eIF4A	0.559806	9.11e-05
P25355	Copper transport protein 86	0.548439	9.13e-05
P41338	Acetyl-CoA acetyltransferase	-0.24346	9.32e-05
P53858	Protein BNI4	0.584473	9.48e-05
P12383	Transcription factor PDR1	0.383532	9.48e-05
P11978	Regulatory protein SIR4	0.394604	9.57e-05
P32569	Mediator of RNA polymerase II transcription subunit 17	0.630397	9.73e-05
P40048	Tyrosine-protein phosphatase 3	0.940678	9.75e-05
P53874	Ubiquitin carboxyl-terminal hydrolase 10	0.706996	9.96e-05
P02992	Elongation factor Tu, mitochondrial	-0.3493	0.0001008
P14681	Mitogen-activated protein kinase KSS1	0.218783	0.000102745
Q86ZR7	Probable pseudouridine-5'-phosphatase YKL033W-A	0.602905	0.000102745
P06782	Carbon catabolite-derepressing protein kinase	0.60544	0.0001029
Q12751	RNA polymerase II assembly factor RTP1	0.910664	0.0001029
P32874	Acetyl-CoA carboxylase, mitochondrial	0.654683	0.000104161
P33329	Serine/threonine-protein phosphatase PP-Z2	0.811321	0.000109352
Q05791	Cell division cycle protein 123	0.580355	0.000109584
P39998	Enhancer of mRNA-decapping protein 3	0.481972	0.000110233
Q06245	Exocyst complex component SEC10	0.39671	0.000110233
P32792	UPF0744 protein YSC83	0.800185	0.000110377
P38863	Spindle pole body component SPC97	0.302569	0.000110423
Q06053	tRNA-dihydrouridine(47) synthase [NAD(P)(+)]	0.639629	0.000110423
P53855	Autophagy-related protein 2	0.777132	0.000110825
P53309	Clathrin coat assembly protein AP180B	0.542131	0.000112028
P53956	Uncharacterized endoplasmic reticulum membrane protein YNL046W	0.626554	0.000112028
P12685	High-affinity potassium transport protein	0.553209	0.000114376
P37370	Verprolin	0.670511	0.000114376
P21592	Protoheme IX farnesyltransferase, mitochondrial	-0.96146	0.000114422
Q12154	ATPase GET3	0.330131	0.000117164
P12695	Dihydrolipoyllysine-residue acetyltransferase component of pyruvate dehydrogenase complex, mitochondrial	0.645781	0.000118465
P25583	Karyogamy protein KAR4	0.546213	0.000119132
P53334	Probable family 17 glucosidase SCW4	-0.81569	0.000120008
P54730	UBX domain-containing protein 4	0.848682	0.000120565
P53230	Phosphatidate cytidylyltransferase, mitochondrial	0.851834	0.000120622
P53137	RQC trigger complex subunit CUE3	0.676076	0.000122113
P32500	Nucleoporin NDC1	0.433504	0.000123147
Q08921	Target of rapamycin complex 1 subunit TCO89	0.0115537	0.00012337
P36069	Probable phosphoglycerate mutase PMU1	0.890603	0.000124439
P40480	Protein HOS4	0.726598	0.000124439
P32497	Eukaryotic translation initiation factor 3 subunit C	0.550799	0.000124875
P03872	Partitioning protein REP2	0.413798	0.000125027
P39523	Uncharacterized protein YMR124W	0.22914	0.000126733
Q12246	Sphingoid long chain base kinase 4	0.708516	0.000126998
P36084	Splicing factor MUD2	0.536559	0.000127437
P53207	U1 small nuclear ribonucleoprotein component SNU71	0.391453	0.000127661
P38892	Probable S-adenosylmethionine-dependent methyltransferase CRG1	0.362587	0.000128114
P38860	GTPase MTG2, mitochondrial	0.552406	0.000129084
P36122	Protein BCH2	0.848005	0.000129127
P38069	Alpha-1,2-mannosyltransferase MNN2	-0.348073	0.00012924
Q04472	Mitochondrial inner membrane i-AAA protease supercomplex subunit MGR3	0.265258	0.00013167
P24720	Protein MNE1	0.724563	0.000135923
P48570	Homocitrate synthase, cytosolic isozyme	1.66179	0.000136668
P38903	Serine/threonine-protein phosphatase 2A 56 kDa regulatory subunit delta isoform	0.705889	0.000137223
P38771	Ribosome-recycling factor, mitochondrial	-0.706401	0.000138753
P40558	Cytosolic Fe-S cluster assembly factor CFD1	0.494328	0.000138803
P37304	Protein PAM1	0.234328	0.000139438
P38230	Probable quinone oxidoreductase	0.682499	0.0001405
P21242	Probable proteasome subunit alpha type-7	0.468302	0.000140777
Q06623	HDA1 complex subunit 3	0.810931	0.000142662
P21243	Proteasome subunit alpha type-1	0.304579	0.000144299
Q06336	ADP-ribosylation factor-binding protein GGA1	0.16685	0.000144671
P32787	Mitochondrial genome maintenance protein MGM101	0.330042	0.000145429
Q03769	Epsin-5	0.443847	0.000145429
P07884	tRNA dimethylallyltransferase	0.588337	0.000147468
P38430	Uncharacterized deoxyribonuclease YMR262W	1.73997	0.000149408
Q12502	Protein LDB19	0.793701	0.000150041
P06367;P39516	Small ribosomal subunit protein uS11A;Small ribosomal subunit protein uS11B	0.119286	0.000150158
P53076	Vacuolar import and degradation protein 30	0.732443	0.000150508
P40491	ATP synthase assembly factor FMC1, mitochondrial	-0.464375	0.000151763
P04840	Mitochondrial outer membrane protein porin 1	0.245963	0.000152162
P34253	Protein KTI12	0.727381	0.000153114
P39969	Protein BOI2	0.66924	0.000153114
Q12494	Inositol hexakisphosphate kinase 1	0.753358	0.000153966
P25365	Putative guanine nucleotide-exchange factor SED4	0.505393	0.000155561
P43603	LAS seventeen-binding protein 3	0.679086	0.000157812
P53270	Uncharacterized protein YGR117C	0.659188	0.000157812
P25441	DNA-directed RNA polymerase III subunit RPC4	0.454192	0.000157832
P37302	Aminopeptidase Y	-0.617121	0.000161657
P15565	tRNA (guanine(26)-N(2))-dimethyltransferase, mitochondrial	0.538763	0.00016181
Q06549	Cytidine deaminase	1.16971	0.000161859
P38993	Iron transport multicopper oxidase FET3	0.839306	0.000162601
Q04226	Transcription initiation factor TFIID subunit 11	0.394207	0.000162605
P32770	Putative RNA-binding protein involved in heterochromatin assembly	0.669645	0.000164751
P18961	Serine/threonine-protein kinase YPK2/YKR2	0.716287	0.000164943
P25635	Periodic tryptophan protein 2	0.588452	0.000165987
Q03151	Mitochondrial GTPase 1	0.68025	0.000166345
P47154	CAAX prenyl protease 1	0.362594	0.000169111
P08466	Mitochondrial nuclease	0.503091	0.000169153
P0CX53;P0CX54	Large ribosomal subunit protein uL11A;Large ribosomal subunit protein uL11B	0.464625	0.000170085
Q05777	Cell wall biogenesis protein NCW2	1.49681	0.000173202
Q12473	Ferric reductase transmembrane component 6	0.535732	0.00017516
P43588	Ubiquitin carboxyl-terminal hydrolase RPN11	0.740999	0.000178287
Q06677	Auxilin-like clathrin uncoating factor SWA2	0.703172	0.000178823
Q99258	3,4-dihydroxy-2-butanone 4-phosphate synthase	-1.56592	0.00017994
Q06648	GTPase-interacting component 2	0.466258	0.000183168
P25349	Flavoprotein-like protein YCP4	0.507892	0.000183464
P34758	Protein SCD5	0.443079	0.00018367
Q12514	General negative regulator of transcription subunit 5	0.661541	0.0001838
Q02969	Peroxisomal membrane protein PEX25	0.619781	0.000187526
P32332	Mitochondrial oxaloacetate transport protein	0.630674	0.000188048
P38272	SWI5-dependent HO expression protein 3	0.322353	0.000188048
P32861	UTP--glucose-1-phosphate uridylyltransferase	0.222487	0.00018864
P40328	Probable 26S proteasome subunit YTA6	0.225841	0.000190095
Q06103	26S proteasome regulatory subunit RPN7	0.349773	0.000190155
P53040	Transcription initiation factor TFIID subunit 6	0.68767	0.000190477
Q12100	Probable serine/threonine-protein kinase RTK1	0.927385	0.000192473
P33322	H/ACA ribonucleoprotein complex subunit CBF5	0.225864	0.00019288
P38810	SED5-binding protein 3	0.681857	0.00019475
P53253	Protein NNF2	0.303345	0.00019507
P42943	T-complex protein 1 subunit eta	0.449808	0.000195986
P40528	Protein SYG1	0.231161	0.000196736
Q06109	Required for respiratory growth protein 8, mitochondrial	0.969684	0.00019784
P38153	AP-3 complex subunit mu	0.420756	0.000203598
P47065	Protein PET130	0.742853	0.000207581
P53930	Protein AF-9 homolog	0.496152	0.000207758
Q04080	GPI transamidase component GPI17	0.713508	0.000207758
Q06412	Rho1 guanine nucleotide exchange factor TUS1	0.55686	0.000207758
Q08873	Transgelin	0.694866	0.000207758
P39006	Phosphatidylserine decarboxylase proenzyme 1, mitochondrial	0.641428	0.000208686
Q06673	Protein ECM30	0.74734	0.000209504
P14737	DNA repair protein RAD9	2.56113	0.000209864
P34223	UBX domain-containing protein 1	-0.275564	0.00021168
P47176	Branched-chain-amino-acid aminotransferase, cytosolic	0.486163	0.000215237
Q02326	Large ribosomal subunit protein eL6A	0.531545	0.000219442
P53615	Carbonic anhydrase	1.47253	0.000220729
Q05931	Iron-sulfur cluster biogenesis chaperone, mitochondrial	0.150749	0.000221225
P0CX43;P0CX44	Large ribosomal subunit protein uL1A;Large ribosomal subunit protein uL1B	0.238135	0.00022161
P22217	Thioredoxin-1	-1.17852	0.000221912
P16140	V-type proton ATPase subunit B	-0.0279704	0.000224598
P32875	Lipoyl synthase, mitochondrial	0.645734	0.000226811
P06700	NAD-dependent histone deacetylase SIR2	0.530893	0.000227351
P25343	Reduced viability upon starvation protein 161	0.796526	0.000231726
P38429	Transcriptional regulatory protein SAP30	0.700902	0.000231726
Q12150	Protein CSF1	0.286489	0.000231726
P05986	cAMP-dependent protein kinase type 3	0.972942	0.000232367
P02557	Tubulin beta chain	0.791726	0.000234638
P36165	Triacylglycerol lipase 4	0.420591	0.000236103
P06115	Catalase T	0.838167	0.000237755
P23201	Protein SPA2	0.0568434	0.000237755
P53912	Uncharacterized protein YNL134C	-0.629113	0.000238633
P53981	Polyol phosphate phosphatase PYP1	-0.544658	0.000240152
P32453	Protein ATP11, mitochondrial	-0.37051	0.000242648
P38353	Sec sixty-one protein homolog	0.380719	0.000245919
Q06632	Protein CFT1	0.838442	0.000245919
P07347	N-terminal acetyltransferase A complex catalytic subunit ARD1	0.833075	0.000246691
P32328	Serine/threonine-protein kinase DBF20	0.65747	0.000248151
Q05672	RNA-binding suppressor of PAS kinase protein 1	0.741294	0.000248639
P43569	CCR4-associated factor 16	-0.832362	0.000252926
Q08968	Protein adenylyltransferase SelO, mitochondrial	0.598081	0.000257586
Q05785	Epsin-2	0.565315	0.000258809
P25369	LAS seventeen-binding protein 5	0.944737	0.00025923
P38731	Siderophore iron transporter ARN1	1.53015	0.000259481
P53075	Outer spore wall assembly protein SHE10	0.384038	0.000260518
P37291	Serine hydroxymethyltransferase, cytosolic	0.276395	0.000263321
Q08229	Protein NBA1	-0.352726	0.00026664
P07263	Histidine--tRNA ligase, mitochondrial	0.287203	0.00026914
P43620	Sporulation protein RMD8	0.475804	0.000269542
P35999	Mitochondrial intermediate peptidase	0.63235	0.000273197
Q06151	m7GpppX diphosphatase	-0.201765	0.000276193
P07253	Cytochrome B pre-mRNA-processing protein 6	-0.391624	0.000278624
P38241	Pre-mRNA-splicing factor SLT11	0.65789	0.000279985
Q05788	Purine nucleoside phosphorylase	-0.589811	0.0002998
P32597	Nuclear protein STH1/NPS1	0.491417	0.000300115
P32793	Protein YSC84	0.630459	0.000305457
P32454	Aminopeptidase 2, mitochondrial	-0.464554	0.000309015
P40219	Outer spore wall protein 5	0.492997	0.000309518
P53280	Protein CAF130	0.511291	0.000310636
P36000	AP-1 complex subunit beta-1	0.585778	0.000313494
P17157	Cyclin-dependent protein kinase PHO85	0.363882	0.000315543
P04456	Large ribosomal subunit protein uL23	0.46651	0.000316385
P43596	ISWI one complex protein 3	0.139481	0.000317793
Q06108	Regulator of the glycerol channel 1	0.588745	0.000321164
P39923	Nitrogen permease regulator 2	0.608032	0.000324274
P25044	Tyrosine-protein phosphatase 1	0.995585	0.00032915
P19659	Mediator of RNA polymerase II transcription subunit 15	0.589178	0.000331083
P53296	Alcohol O-acetyltransferase 2	1.20372	0.000331439
P48164	Small ribosomal subunit protein eS7B	0.23742	0.000336826
P43573	Bud site selection protein 27	0.642741	0.000337885
P53273	Uncharacterized vacuolar membrane protein YGR125W	0.424814	0.000350136
P38934	Nuclear segregation protein BFR1	0.462564	0.000351823
P19812	E3 ubiquitin-protein ligase UBR1	0.634975	0.00035609
P11075	Protein transport protein SEC7	0.56824	0.000356145
P38803	Pre-rRNA-processing protein IPI1	0.710356	0.000357042
P43570	GTPase-activating protein GYP8	0.773976	0.000359371
Q04947	Reticulon-like protein 1	0.17263	0.000364908
P32316	Acetyl-CoA hydrolase	0.394146	0.000368421
P48365	GTPase-activating protein GYP7	0.411376	0.000370159
P40013	Protein BIM1	0.636599	0.000370373
Q03707	Inner nuclear membrane protein SRC1	0.44284	0.000371245
Q07938	S-methyl-5'-thioadenosine phosphorylase	0.847404	0.000371245
P52923	Apoptosis-inducing factor 1	0.883585	0.00037381
Q08193	1,3-beta-glucanosyltransferase GAS5	0.52177	0.00037381
P15442	eIF-2-alpha kinase GCN2	0.459504	0.00038082
Q12109	Tryptophan--tRNA ligase, cytoplasmic	0.372444	0.000381366
P33339	Transcription factor tau 131 kDa subunit	0.654418	0.000387409
P07170	Adenylate kinase	-1.13018	0.000389436
P11914	Mitochondrial-processing peptidase subunit alpha	-0.452489	0.000392098
P19516	Cytochrome c oxidase assembly protein COX11, mitochondrial	-0.736172	0.000395078
P41930	Sulfite efflux pump SSU1	0.779194	0.000395078
P43638	MAP-homologous protein 1	0.612663	0.000395078
Q06150	Protein BOP2	1.70781	0.00039624
P38063	Ribose-phosphate pyrophosphokinase 4	0.803629	0.000397339
P53196	26S proteasome regulatory subunit RPN14	0.592474	0.000397339
P25443	Small ribosomal subunit protein uS5	0.590433	0.000398413
Q06839	PX domain-containing protein YPR097W	0.64139	0.000398651
P53045	C-4 methylsterol oxidase ERG25	0.695172	0.000400098
P23644	Mitochondrial import receptor subunit TOM40	0.431259	0.00040984
P41543	Dolichyl-diphosphooligosaccharide--protein glycosyltransferase subunit 1	0.800182	0.000414818
P47006	DNA-directed RNA polymerase I subunit RPA34	0.575919	0.00041756
P38041	Protein BOB1	0.0706192	0.000418885
P06785	Thymidylate synthase	0.413237	0.000420332
P46682	AP-3 complex subunit beta	0.471014	0.00042497
P03875	Putative COX1/OXI3 intron 1 protein	0.612716	0.00042679
P23642	Mannan polymerase I complex VAN1 subunit	0.0813858	0.000427714
P52553	Prefoldin subunit 6	-1.00744	0.000428122
P39904	Vacuolar protein sorting-associated protein 52	0.654067	0.000438647
P52918	Protein MSN5	0.740469	0.000446062
Q06214	WD repeat-containing protein JIP5	0.176188	0.000447295
Q12171	Mitochondrial distribution and morphology protein 32	0.313556	0.000447636
P27697	Atypical kinase COQ8, mitochondrial	0.502657	0.00045997
Q04749	Target of rapamycin complex 2 subunit AVO2	0.900575	0.000460524
Q08220	Glutathione synthetase GSH2	-0.649885	0.000460524
Q08826	Sorting nexin-3	0.500507	0.000460524
P36049	rRNA-processing protein EBP2	0.329698	0.000461209
Q04235	tRNA wybutosine-synthesizing protein 2	0.928764	0.000466412
P29539	Telomere length regulator protein RIF1	0.655239	0.00047039
P32788	Uncharacterized protein YBL010C	0.781347	0.00047039
P53333	Pre-mRNA-splicing factor CWC22	0.61978	0.000471371
P54005	Protein DIA1	1.24671	0.000473703
P40094	Conserved oligomeric Golgi complex subunit 3	0.1468	0.000480819
P11792	Serine/threonine-protein kinase SCH9	0.386653	0.000482152
P18851	Guanine nucleotide-binding protein subunit beta	0.49939	0.000482152
P40151	DNA-dependent ATPase MGS1	0.102984	0.000482152
P40308	Triacylglycerol lipase 3	0.284827	0.000489406
P32599	Fimbrin	0.285659	0.000494162
P53878	Uncharacterized oxidoreductase YNL181W	0.619104	0.000494821
P48015	Aminomethyltransferase, mitochondrial	0.831074	0.000494919
Q06315	Protein SKG3	0.475246	0.000503425
P08678	Adenylate cyclase	0.280259	0.000510707
P25558	Bud site selection protein 3	0.418735	0.000510707
Q03558	NADPH dehydrogenase 2	-0.68328	0.000510707
Q04299	Probable ADP-ribose 1''-phosphate phosphatase YML087W	0.720129	0.00051341
Q08732	Serine/threonine-protein kinase HRK1	0.499971	0.000514036
P36516	Large ribosomal subunit protein mL44	-0.374474	0.000528944
P53894	Serine/threonine-protein kinase CBK1	0.772159	0.000528944
P19735	Pre-mRNA-splicing factor 6	0.907979	0.000533546
Q12518	Epsin-1	0.238666	0.00053503
P53112	Peroxisomal membrane protein PEX14	-0.28106	0.000538416
P43586	60S ribosomal subunit assembly/export protein LOC1	0.849559	0.000542212
P09734	Tubulin alpha-3 chain	0.602416	0.000542345
P41911	Glycerol-3-phosphate dehydrogenase [NAD(+)] 2, mitochondrial	0.879179	0.00054432
P23638	Proteasome subunit alpha type-3	0.547857	0.000550012
P38705	Serine--tRNA ligase, mitochondrial	-0.340802	0.000550238
P32794	ATPase family gene 2 protein	0.508608	0.00055207
P38426	Trehalose synthase complex regulatory subunit TPS3	0.457842	0.000555906
P46678	Transcription factor TFIIIB component B''	0.750712	0.0005566
Q03661	Silent chromatin protein ESC1	0.568721	0.000557849
P07273	Transcription elongation factor S-II	0.674359	0.000559057
Q06679	U3 small nucleolar RNA-associated protein 4	0.00714952	0.000559057
Q08959	Phosphatidylglycerol phospholipase C	0.452701	0.000559057
P46669	DNA-directed RNA polymerase I subunit RPA43	0.390719	0.000565998
Q03768	Protein GIR2	0.53648	0.00056675
P35729	Nucleoporin NUP120	0.0998058	0.000571581
Q12029	Sideroflexin FSF1	0.447584	0.000571581
Q04199	Chromatin assembly factor 1 subunit p60	0.284562	0.000587944
P47148	Peroxisomal protein 2	1.11219	0.000589713
P25694	Cell division control protein 48	0.395784	0.000590268
Q06510	Tafazzin	-0.474772	0.000595478
P40210	Protein SIP5	0.447757	0.0006006
P53848	Folic acid synthesis protein FOL1	0.781807	0.000601097
P07284	Serine--tRNA ligase, cytoplasmic	0.370105	0.0006012
Q03161	Glucose-6-phosphate 1-epimerase	-0.0441197	0.000602289
P08539	Guanine nucleotide-binding protein alpha-1 subunit	0.519966	0.000609152
P0CX82;P0CX83	Large ribosomal subunit protein eL19A;Large ribosomal subunit protein eL19	0.483558	0.000609152
Q02792	5'-3' exoribonuclease 2	0.521283	0.00061607
P36051	GPI ethanolamine phosphate transferase 1	0.16294	0.000620646
P53955	Phosphatidylinositol 4,5-bisphosphate-binding protein SLM2	0.389217	0.000628196
P16892	Mitogen-activated protein kinase FUS3	0.494723	0.000630302
P39742	Translocation protein SEC72	0.204252	0.00063138
Q02875	SMY2 homolog 2	0.517948	0.000632034
P39520	Protein IFH1	0.694756	0.000637529
Q08650	Diacylglycerol O-acyltransferase 1	0.238353	0.000643609
P39113	Regulatory protein CAT8	1.00295	0.000648252
P16661	Chitobiosyldiphosphodolichol beta-mannosyltransferase	0.539106	0.000649055
P43636	Alpha-1,3/1,6-mannosyltransferase ALG2	0.462343	0.000650553
Q07527	tRNA (guanosine(18)-2'-O)-methyltransferase	0.0942082	0.000650553
P27636	Cell division control protein 15	0.541637	0.000660168
P25582	27S pre-rRNA (guanosine(2922)-2'-O)-methyltransferase	0.524091	0.000661452
P34222	Peptidyl-tRNA hydrolase 2	0.760995	0.000664894
P38115	D-arabinose dehydrogenase [NAD(P)+] heavy chain	-0.490762	0.000664894
P40693	Ribosome biogenesis protein RLP7	0.483881	0.00066635
P19881	4-nitrophenylphosphatase	-0.478457	0.000672257
P53944	Mitochondrial MRF1 N(5)-glutamine methyltransferase MTQ1	0.628514	0.000672257
P38213	Protein DSF2	0.567101	0.000674364
P40029	Peptide methionine sulfoxide reductase	0.723895	0.000674793
P05030	Plasma membrane ATPase 1	-0.0526251	0.000677448
P28708	Serine/threonine-protein kinase PRR1	0.672945	0.000682194
Q12206	Transcriptional modulator WTM2	1.64067	0.000682194
P38996	Nuclear polyadenylated RNA-binding protein 3	0.670309	0.000686626
Q06287	Ribosomal RNA small subunit methyltransferase NEP1	0.48888	0.000691193
P53599	MAP kinase kinase kinase SSK2	0.942275	0.000692243
P47084	MIOREX complex component 12	0.586587	0.000703601
Q05166	Nucleoporin ASM4	0.307817	0.000705121
P33309	Protein DOM34	0.662942	0.00070852
P52489	Pyruvate kinase 2	0.482501	0.000711948
Q03862	Probable metalloprotease ARX1	0.443411	0.000711948
Q07655	Protein WHI4	0.905523	0.000711948
O13547	Covalently-linked cell wall protein 14	-0.999081	0.000714149
Q08960	S-adenosyl-L-methionine-dependent tRNA 4-demethylwyosine synthase	0.272043	0.000714824
P53935	Stress response protein NST1	0.503505	0.000720027
P31116	Homoserine dehydrogenase	-0.138015	0.000720644
P47075	Vacuolar transporter chaperone complex subunit 4	0.199743	0.000726578
Q7LHG5;Q99315	Transposon Ty3-I Gag-Pol polyprotein;Transposon Ty3-G Gag-Pol polyprotein	1.76986	0.000726725
P40986	Cell division control protein 1	0.397351	0.000732165
P32480	Protein HIR2	0.388022	0.00074081
P22211	Nitrogen permease reactivator protein	0.325992	0.00074618
Q99314	Something about silencing protein 5	0.784919	0.00074618
P33400	pH-response transcription factor pacC/RIM101	0.790974	0.000762681
P13298	Orotate phosphoribosyltransferase 1	-0.84236	0.000762814
P39531	Recyclin-1	0.337351	0.000762814
P39676	Flavohemoprotein	0.525633	0.00076833
Q05871	3,2-trans-enoyl-CoA isomerase	0.525968	0.000769443
P38817	ADP-ribosylation factor-binding protein GGA2	0.593035	0.000778718
Q12236	Serine/threonine-protein kinase PKH2	0.381299	0.000782987
P49626	Large ribosomal subunit protein uL4B	0.732567	0.00078451
Q06604	Protein BSP1	0.174518	0.000786182
P14772	Bile pigment transporter 1	0.54432	0.000794753
P11325	Leucine--tRNA ligase, mitochondrial	-0.310666	0.000795751
Q02201	Oxysterol-binding protein homolog 6	0.477977	0.000797755
P32839	Mitochondrial chaperone BCS1	-0.436253	0.000798206
P06783	Pheromone a factor receptor	0.588851	0.000822454
Q07845	Polynucleotide 5'-hydroxyl-kinase GRC3	0.610963	0.000826492
P40015	Inositol phosphosphingolipids phospholipase C	0.367215	0.000834881
P32047	Protein MLF3	0.399783	0.000835508
Q12181	NADPH-dependent diflavin oxidoreductase 1	0.540183	0.000837706
P32621	Guanosine-diphosphatase	-0.0171208	0.000838791
Q05549	ATP-dependent helicase HRQ1	0.629419	0.000838791
P05066	Deoxyribodipyrimidine photo-lyase, mitochondrial	0.902752	0.00084387
P17121	GTPase-activating protein SAC7	0.581588	0.000861756
Q03330	Histone acetyltransferase GCN5	1.0781	0.000865453
P03874	Cytochrome B pre-mRNA-processing protein 2	0.272557	0.00086602
Q04458	Fatty aldehyde dehydrogenase HFD1	0.401445	0.000867864
Q08742	Thiosulfate sulfurtransferase RDL2, mitochondrial	-0.788991	0.000877215
P32502	Translation initiation factor eIF-2B subunit beta	0.708663	0.000880058
Q08004	Bud site selection protein 20	0.454772	0.000881568
P00044	Cytochrome c isoform 1	0.770088	0.000886249
P53925	Uncharacterized vacuolar membrane protein YNL115C	0.458197	0.000894402
P25373	Glutaredoxin-1	-0.773942	0.00091988
P39986	Endoplasmic reticulum transmembrane helix translocase	0.180597	0.00092148
P27476	Nuclear localization sequence-binding protein	0.270348	0.000922338
Q12093	Mitochondrial tRNA-specific 2-thiouridylase 1	0.450018	0.000922338
Q12339	rRNA-processing protein UTP23	0.438496	0.000923915
Q12230	Sphingolipid long chain base-responsive protein LSP1	0.306776	0.000926569
P53753	Glucan endo-1,3-beta-D-glucosidase 1	-0.776837	0.000934238
P53218	Ribonucleases P/MRP protein subunit POP6	0.714589	0.000935694
P32902	Small ribosomal subunit protein uS2m	0.246287	0.000943903
P38759	Vacuolar protein sorting-associated protein 29	0.773793	0.000973994
Q03503	N-alpha-acetyltransferase 30	0.680109	0.000977377
P53941	U3 small nucleolar ribonucleoprotein protein IMP4	0.531049	0.000979084
P54114	Aldehyde dehydrogenase [NAD(P)+] 2	0.324174	0.000979084
P15625	Phenylalanine--tRNA ligase alpha subunit	0.328849	0.000979677
P40343	Vacuolar protein sorting-associated protein 27	0.404986	0.000982528
P38334	Trafficking protein particle complex subunit 20	0.804683	0.00100662
P32527	Zuotin	0.453112	0.00101329
P05743	Large ribosomal subunit protein uL24A	0.651433	0.00101611
Q06137	Putative 6-phosphofructo-2-kinase/fructose-2,6-bisphosphatase YLR345W	0.302132	0.00103126
P46997	J protein JJJ2	0.87412	0.00104994
P39928	Osmosensing histidine protein kinase SLN1	0.358818	0.00105294
P26570	Serine/threonine-protein phosphatase PP-Z1	0.461283	0.00105452
P32656	Glutathione-specific gamma-glutamylcyclotransferase	0.854698	0.00105452
P36059	ATP-dependent (S)-NAD(P)H-hydrate dehydratase	0.0556329	0.00106337
P40350	Dolichyl-phosphate beta-glucosyltransferase	0.257749	0.00107231
P39945	Protein AST2	0.938538	0.0010753
P40897	Oligopeptide transporter 1	0.935844	0.00108454
P48362	Protein HGH1	0.523055	0.00108651
P48837	Nucleoporin NUP57	0.35589	0.00108651
P39011	GTPase-GDP dissociation stimulator BEM4	0.514468	0.00108651
P40483	Putative zinc metalloproteinase YIL108W	0.253872	0.00108651
P40078	Ribosome biogenesis protein NSA2	0.37198	0.00110521
P53604	Protein MSO1	0.680049	0.00114188
P53064	RNA polymerase-associated protein RTF1	0.612151	0.00114674
P38222	Ribosomal lysine N-methyltransferase 3	1.17037	0.00114991
P22219	Serine/threonine-protein kinase VPS15	0.360036	0.00115371
P53096	Probable histone deacetylase HOS2	0.603615	0.00115828
P33775	Dolichyl-phosphate-mannose--protein mannosyltransferase 1	0.386615	0.00117206
Q04182	ATP-dependent permease PDR15	0.601957	0.00117267
P53923	Cytoplasmic tRNA 2-thiolation protein 2	0.674313	0.00118631
P39744	Nucleolar complex protein 2	0.954199	0.00119162
P47122	GPN-loop GTPase 1	0.734877	0.00119215
P38747	OTU domain-containing protein 2	0.280174	0.00120202
P40353	Alcohol O-acetyltransferase 1	0.297049	0.00120434
Q06639	Chromatin structure-remodeling complex protein RSC3	0.304427	0.00121342
Q06168	Chromatin structure-remodeling complex subunit SFH1	0.656785	0.00124634
P40518	Actin-related protein 2/3 complex subunit 5	0.371381	0.00125472
P25366	Protein OCA4	0.687456	0.00125594
Q12417	Pre-mRNA-splicing factor PRP46	0.44887	0.001256
P0C0W9;Q3E757	Large ribosomal subunit protein uL5A;Large ribosomal subunit protein uL5B	0.108481	0.00125711
P47083	U3 small nucleolar RNA-associated protein MPP10	-0.462023	0.0012663
Q05498	rRNA-processing protein FCF1	0.596582	0.00127941
Q00582	GTP-binding protein GTR1	0.596161	0.00128305
P32618	Uncharacterized protein YEL043W	0.403255	0.00128941
Q06543	GPN-loop GTPase 3	0.508213	0.00128941
P23248	Small ribosomal subunit protein eS1B	0.401651	0.00129644
P38631	1,3-beta-glucan synthase component FKS1	0.271015	0.00130018
P31755	Initiation-specific alpha-1,6-mannosyltransferase	0.621515	0.00130134
Q04697	Glucose-signaling factor 2	0.248957	0.00130875
P13712	Chromatin assembly factor 1 subunit p50	0.587021	0.00130932
P32474	Protein disulfide-isomerase EUG1	0.908354	0.00130932
P40047	Aldehyde dehydrogenase 5, mitochondrial	0.509191	0.00130932
P40509	Coatomer subunit epsilon	0.962179	0.00131072
P09880	tRNA ligase	0.438733	0.00131112
P16547	Mitochondrial outer membrane protein OM45	0.506211	0.00131112
P53617	Protein NRD1	0.584654	0.00131112
P47130	Cop9 signalosome complex subunit 12	0.811912	0.00131359
P53312	Succinate--CoA ligase [ADP-forming] subunit beta, mitochondrial	0.360423	0.00131763
Q02774	Secretory component protein SHR3	0.714464	0.00133547
P38072	Protein SCO2, mitochondrial	-0.269454	0.0013375
Q03246	Small ribosomal subunit protein uS17m	0.243131	0.0013375
Q03308	Vacuolar protein sorting-associated protein 16	0.431546	0.00134733
Q12199	Type 2A phosphatase activator TIP41	0.539331	0.00134733
P48566	GTPase-activating protein GYP3	0.762414	0.00136068
P32485	Mitogen-activated protein kinase HOG1	0.358135	0.0013666
Q07457	E3 ubiquitin-protein ligase BRE1	-0.00119649	0.00136774
Q06697	Cell division control protein 73	0.166337	0.00138104
P0CX39;P0CX40	Small ribosomal subunit protein eS8A;Small ribosomal subunit protein eS8B	0.41687	0.00139139
P46947	Pre-mRNA-splicing factor CWC26	0.41217	0.00139155
P36152	Fe-S cluster assembly protein DRE2	-0.145323	0.00140276
P22579	Transcriptional regulatory protein SIN3	0.754677	0.00140292
P53927	Ribosome biogenesis protein 15	0.645796	0.00140292
P18409	Mitochondrial distribution and morphology protein 10	0.585928	0.00141387
P38431	Eukaryotic translation initiation factor 5	0.139865	0.00141731
Q02771	Protein PET117, mitochondrial	-2.11366	0.00143133
Q06554	Uncharacterized ATP-dependent helicase IRC20	0.322952	0.00143627
P43621	Coatomer subunit delta	0.470998	0.00144569
Q12415	Transcription factor tau 55 kDa subunit	0.362864	0.00145492
P53379	Aspartic proteinase MKC7	0.787089	0.00147985
Q04632	Conserved oligomeric Golgi complex subunit 8	0.757809	0.00148864
Q06821	Uncharacterized protein YPR084W	0.466357	0.00149959
P16622	Ferrochelatase, mitochondrial	0.280847	0.00150596
Q01159	mRNA-capping enzyme subunit alpha	0.779921	0.0015082
P38991	Spindle assembly checkpoint kinase	0.646549	0.0015088
P40309	K(+)/H(+) antiporter 1	0.616324	0.00152136
Q6Q560	Protein ISD11	0.576737	0.00152136
Q07508	Protein LUC7	0.432163	0.00153182
P06106	Homocysteine/cysteine synthase	0.127778	0.00153857
P32445	Single-stranded DNA-binding protein RIM1, mitochondrial	0.442994	0.00154356
P10355	Protein PET122, mitochondrial	0.657599	0.00155512
P10363	DNA primase small subunit	0.637617	0.0015571
P25302	Regulatory protein SWI4	0.500089	0.00156562
Q06224	Endoribonuclease YSH1	0.0767506	0.00157628
P32783	mRNA cap guanine-N7 methyltransferase	0.448265	0.00157934
P32803	Endosomal protein P24B	0.397733	0.00159518
P87108	Mitochondrial import inner membrane translocase subunit TIM10	-0.641809	0.00160187
P29453	Large ribosomal subunit protein eL8B	0.728327	0.00161982
P32465	Low-affinity glucose transporter HXT1	0.507875	0.0016372
P53886	Anaphase-promoting complex subunit 1	0.609292	0.00164217
Q12207	Non-classical export protein 2	0.987284	0.00164904
P36102	PAN2-PAN3 deadenylation complex subunit PAN3	0.6926	0.00165019
P53600	Coatomer subunit zeta	0.534888	0.00165339
P38620	Ribose-phosphate pyrophosphokinase 2	0.766186	0.00167048
P53155	Uncharacterized protein YGL082W	0.722525	0.00167223
P24784	ATP-dependent RNA helicase DBP1	0.672552	0.00167328
P50947	Transcriptional regulatory protein PHO23	0.634266	0.00167328
P25574	ER membrane protein complex subunit 1	0.227033	0.0016836
Q07684	Morphogenetic regulator of filamentous growth protein 1	0.948352	0.00168772
P32339	Heme-binding protein HMX1	0.704471	0.00169349
P40994	ADP-ribosylation factor 3	0.456039	0.00169349
Q12428	Probable 2-methylcitrate dehydratase	1.15627	0.00169349
P40557	ER-retained PMA1-suppressing protein 1	0.162621	0.00171261
P43590	Uncharacterized peptidase YFR006W	-0.661486	0.0017139
P39524	Phospholipid-transporting ATPase DRS2	0.396564	0.00171783
P36103	Uncharacterized protein YKL023W	0.907893	0.00171879
Q02950	Small ribosomal subunit protein bS1m	0.549273	0.00171879
Q06143	Mitochondrial dicarboxylate transporter	0.643387	0.00173098
P47005	F-box protein DAS1	0.878143	0.00173486
P47156	Histone demethylase JHD2	0.802554	0.00173486
Q99186	AP-2 complex subunit mu	0.641289	0.00173638
P53043	Serine/threonine-protein phosphatase T	0.647764	0.00173782
P34078	Protein LTV1	0.711106	0.00176465
Q03957	CTD kinase subunit alpha	0.680226	0.00178085
P32363	Phosphatidylinositol N-acetylglucosaminyltransferase GPI3 subunit	0.149062	0.00178932
P33891	Protein transport protein TIP20	0.286731	0.00179313
P32478	Cell wall mannoprotein HSP150	-1.08815	0.0017986
P17076	Large ribosomal subunit protein eL8A	0.914856	0.00180032
P38825	Protein TOM71	0.345419	0.00181441
Q03771	Assembly chaperone of RPL4	0.916276	0.00184435
Q12454	Putative tyrosine-protein phosphatase OCA6	0.562208	0.00184562
P39717	Guanine nucleotide-binding protein subunit beta 2	0.730415	0.00184853
P42940	Probable electron transfer flavoprotein subunit beta	0.497873	0.00184913
P25333	Serine/threonine-protein kinase HAL4/SAT4	0.645641	0.00185437
P53743	Pre-rRNA-processing protein ESF2	0.520054	0.00185658
P36531	Large ribosomal subunit protein bL31m	-0.182577	0.00186184
P40495	Homoisocitrate dehydrogenase, mitochondrial	0.380128	0.00186184
Q05584	Hydroxyacylglutathione hydrolase, cytoplasmic isozyme	-0.486047	0.00186184
Q08634	Uncharacterized protein YOR238W	0.614841	0.00186927
P80428	Actin-related protein 4	-0.25504	0.00187411
P38809	Uncharacterized protein YHR097C	0.721368	0.0018967
Q12442	ADIPOR-like receptor IZH2	0.790451	0.00190036
P53336	Putative methyltransferase YGR283C	0.58118	0.00190037
P37366	Cyclin CCL1	0.703066	0.00190598
P40492	Protein FYV10	0.416581	0.00191029
P32915	Protein transport protein SEC61	0.162597	0.00191362
P38187	Ubiquitin carboxyl-terminal hydrolase 13	0.337336	0.00193713
Q12139	Zinc finger protein YPR022C	0.539377	0.00193713
P47190	Dolichyl-phosphate-mannose--protein mannosyltransferase 3	0.55014	0.00193975
P38623	Serine/threonine-protein kinase RCK2	0.133453	0.00194087
P32623	Probable glycosidase CRH2	0.486836	0.00195404
P26783	Small ribosomal subunit protein uS7	0.486759	0.00197982
P28795	Peroxisomal biogenesis factor 3	0.71338	0.00199502
P47042	Probable serine/threonine-protein kinase IKS1	0.449847	0.00200261
P33894	Dipeptidyl aminopeptidase A	0.207883	0.0020155
Q02336	Transcriptional adapter 2	0.617275	0.00202509
P28321	Monoglyceride lipase	0.450207	0.00203052
P39732	GLC7-interacting protein 4	0.745836	0.00203052
P32796	Carnitine O-acetyltransferase, mitochondrial	0.214244	0.00203415
P36132	tRNA N6-adenosine threonylcarbamoyltransferase	0.812412	0.00203759
P53954	GDP-Man:Man(3)GlcNAc(2)-PP-Dol alpha-1,2-mannosyltransferase	-0.495893	0.00203981
Q3E705	rRNA-processing protein EFG1	0.593614	0.00203981
Q12527	Autophagy-related protein 11	0.479924	0.00205098
P25298	mRNA 3'-end-processing protein RNA14	0.402616	0.00205708
Q03790	Nucleoporin NUP53	0.525395	0.0020651
Q12499	Nucleolar protein 58	0.719524	0.00206576
P53829	Protein CAF40	0.649041	0.00209328
P47171	Histone transcription regulator 3	0.248032	0.00210713
P41903	Peroxisomal acyl-coenzyme A thioester hydrolase 1	0.123624	0.00212412
P0CX45;P0CX46	Large ribosomal subunit protein uL2A;Large ribosomal subunit protein uL2B	0.339913	0.00215648
P38555	GTP-binding protein YPT31/YPT8	0.726159	0.00217407
Q08245	Protein ZEO1	-0.329297	0.00217407
P42937	CDC25-like phosphatase YCH1	0.300689	0.00218093
P14120	Large ribosomal subunit protein eL30	0.836601	0.00218177
P32481	Eukaryotic translation initiation factor 2 subunit gamma	0.416634	0.00221672
Q12306	Ubiquitin-like protein SMT3	-0.555321	0.00222395
P38878	Endoplasmic reticulum junction formation protein lunapark	0.326757	0.00222565
Q12167	Required for respiratory growth protein 1, mitochondrial	0.622931	0.00222565
P10592	Heat shock protein SSA2	0.406243	0.00222788
Q01919	Serine/threonine-protein kinase KIN4	0.500562	0.00231115
P32347	Uroporphyrinogen decarboxylase	-0.261886	0.00231906
P53730	Dol-P-Man:Man(7)GlcNAc(2)-PP-Dol alpha-1,6-mannosyltransferase	0.176387	0.00240702
P47041	Target of rapamycin complex 2 subunit BIT61	0.766292	0.0024535
Q04781	E3 ubiquitin-protein ligase listerin	0.153382	0.00245451
Q08925	RNA-binding protein MRN1	0.0308487	0.0024585
P60010	Actin	0.255274	0.00250753
Q02199	Nucleoporin NUP49/NSP49	0.131813	0.00250874
P32913	Vacuolar protein sorting-associated protein 17	0.487635	0.00251698
P22803	Thioredoxin-2	-1.33891	0.00252626
P53890	Bud neck protein 5	0.761426	0.00252928
P36104	COMPASS component SWD2	0.772004	0.00254402
P46672	tRNA-aminoacylation cofactor ARC1	0.328723	0.00254402
Q06991	Protein PUN1	0.392023	0.00254402
Q12028	AP-1 complex subunit gamma-1	0.186362	0.00254402
P53839	Glyoxylate reductase 1	0.314363	0.00254946
P53961	Phosphatidylinositol N-acetylglucosaminyltransferase subunit GPI15	0.507506	0.00257202
Q05021	Transcription initiation factor TFIID subunit 7	0.811123	0.00259569
P39743	Reduced viability upon starvation protein 167	0.382125	0.00260176
P32562	Cell cycle serine/threonine-protein kinase CDC5/MSD2	0.713224	0.00260729
O14467	Multiprotein-bridging factor 1	0.384696	0.00260919
P53185	Uncharacterized protein YGL036W	0.490273	0.00262542
P37020	Anion/proton exchange transporter GEF1	0.248761	0.00262548
P10834	Protein PET54	0.299317	0.00263451
P36141	Putative redox protein FMP46, mitochondrial	0.731359	0.00265016
Q08548	Lysophospholipid acyltransferase	0.450997	0.00265089
P46970	Nonsense-mediated mRNA decay protein 5	0.507275	0.00265231
P28742	Kinesin-like protein KIP1	0.597163	0.00265768
Q04779	Transcriptional regulatory protein RCO1	0.685936	0.00265885
P53932	Uncharacterized transporter YNL095C	1.12122	0.00268149
P24814	SCF E3 ubiquitin ligase complex F-box protein GRR1	0.576575	0.00268364
P53598	Succinate--CoA ligase [ADP-forming] subunit alpha, mitochondrial	0.449731	0.00268364
P19955	37S ribosomal protein YMR-31, mitochondrial	0.628339	0.0026912
Q03028	Mitochondrial 2-oxodicarboxylate carrier 1	0.288766	0.00270489
Q12068	NADPH-dependent methylglyoxal reductase GRE2	-0.431402	0.00270489
P18410	Sporulation-specific protein SPO7	0.855227	0.00271626
P38744	Putative pterin-4-alpha-carbinolamine dehydratase	0.831058	0.00271708
P53378	Tubulin gamma chain	0.707845	0.00272648
Q07824	Polyamine transporter 1	-0.48466	0.00272648
P40487	2-(3-amino-3-carboxypropyl)histidine synthase subunit 1	0.130457	0.00273716
P02381	Small ribosomal subunit protein uS3m	0.447164	0.00279397
P38700	Adaptin medium chain homolog APM2	0.681509	0.00282516
P39722	Mitochondrial Rho GTPase 1	0.384205	0.00283584
P47048	Uncharacterized protein YJL049W	0.671301	0.00283696
P40413	T-complex protein 1 subunit epsilon	0.315948	0.00286319
P54786	Protein ZDS2	0.277063	0.00287366
P33412	Ethanolamine-phosphate cytidylyltransferase	0.504087	0.00288769
Q02959	Histone deacetylase HOS3	0.0931982	0.00290367
Q12035	rRNA-processing protein FCF2	0.685055	0.00291314
P14164	ARS-binding factor 1	-0.237754	0.0029198
P53037	Phosphatidylserine decarboxylase proenzyme 2	0.263084	0.0029198
P29055	Transcription initiation factor IIB	0.380764	0.00292042
P38966	Vacuole transporter chaperone complex subunit 5	-0.0295498	0.00292409
P32606	Putative mitochondrial translation system component PET127	0.281604	0.00297103
P43123	UDP-N-acetylglucosamine pyrophosphorylase	0.246769	0.00298855
P34246	Maintenance of telomere capping protein 2	0.637093	0.00301688
P46948	Exosome complex component SKI6	0.601963	0.00302859
Q04081	Leucine carboxyl methyltransferase 1	0.45393	0.00303563
P52892	Probable alanine aminotransferase	0.53183	0.00304319
Q06504	N-terminal acetyltransferase B complex catalytic subunit NAT3	0.974758	0.00304319
P32579	Threonylcarbamoyl-AMP synthase	0.683392	0.00305616
P40414	Tropomyosin-2	-1.10277	0.00305693
P02406	Large ribosomal subunit protein uL15	0.218659	0.0030768
P13259	Choline-phosphate cytidylyltransferase	0.238382	0.0030768
P38341	MICOS complex subunit MIC12	-0.575544	0.0030768
P05375	Phosphatidyl-N-methylethanolamine N-methyltransferase	0.686663	0.00311102
P41812	Ribonucleases P/MRP protein subunit POP1	0.282123	0.00311638
P53983	Probable ERAD-associated E3 ubiquitin-protein ligase ASI1	0.287921	0.00311638
P53217	Uncharacterized membrane protein YGR026W	0.406294	0.00312184
Q2V2P7	Uncharacterized protein YDR461C-A	1.30017	0.00312241
P53909	Adenine deaminase	1.0314	0.0031263
Q04089	Histone-lysine N-methyltransferase, H3 lysine-79 specific	0.724493	0.00314848
Q07821	Iron-sulfur assembly protein 1	0.693322	0.00314884
P16387	Pyruvate dehydrogenase E1 component subunit alpha, mitochondrial	0.367891	0.00317451
Q08269	Magnesium transporter ALR1	0.379615	0.00318679
P39726	Glycine cleavage system H protein, mitochondrial	0.471932	0.00320316
Q07914	Mitochondrial import inner membrane translocase subunit TIM14	-0.0681369	0.00320316
P40075	Vesicle-associated membrane protein-associated protein SCS2	0.634158	0.00322692
P38335	Maintenance of telomere capping protein 4	0.427449	0.00323222
Q12055	Adenylate kinase isoenzyme 6 homolog FAP7	0.464438	0.00324504
P0CX49;P0CX50	Large ribosomal subunit protein eL18A;Large ribosomal subunit protein eL18B	0.83223	0.00324912
P14065	Glycerol 2-dehydrogenase (NADP(+))	0.854252	0.00324912
Q05029	Protein BCH1	0.939574	0.00326354
Q05521	Diacylglycerol pyrophosphate phosphatase 1	1.1844	0.00326629
P57744	Mitochondrial import inner membrane translocase subunit TIM8	-1.38919	0.00328538
P05748	Large ribosomal subunit protein eL15A	0.336726	0.00329643
Q12049	Protein THP3	0.673293	0.00332117
P29704	Squalene synthase ERG9	0.438493	0.00332388
P39522	Dihydroxy-acid dehydratase, mitochondrial	0.318367	0.00332875
P32349	DNA-directed RNA polymerase III subunit RPC3	0.59002	0.00337127
Q03262	Phosphoribomutase	-0.29222	0.00337807
P39938;P39939	Small ribosomal subunit protein eS26A;Small ribosomal subunit protein eS26B	0.390929	0.00340528
Q12462	Peroxisomal membrane protein PMP27	0.581127	0.00342781
Q07897	Protein CMS1	0.499601	0.00344677
P36159	Ribonuclease Z	0.440525	0.0034605
Q04305	U3 small nucleolar RNA-associated protein 15	0.386578	0.00346118
P39079	T-complex protein 1 subunit zeta	0.541363	0.00348745
P09457	ATP synthase subunit 5, mitochondrial	0.486996	0.00350025
Q02685	RecQ-mediated genome instability protein 1	0.748468	0.00352906
Q12204	Probable phospholipase YOR022C, mitochondrial	0.638121	0.00352906
P32789	Serine/threonine-protein kinase Haspin homolog ALK2	0.745034	0.00354278
P53959	Conserved oligomeric Golgi complex subunit 6	0.779405	0.0035605
P23833	Protein SCO1, mitochondrial	-0.765905	0.00357015
P06701	Regulatory protein SIR3	0.598441	0.00358862
P38066	GTP cyclohydrolase-2	0.500309	0.00361809
P40185	Protein MMF1, mitochondrial	0.112609	0.00368191
Q06479	F-box protein YLR352W	0.632154	0.00369082
P32338	Zinc finger protein RME1	0.786429	0.00372168
P32660	Phospholipid-transporting ATPase DNF1	0.509123	0.00372168
Q08977	Cu(2+) suppressing and bleomycin sensitive protein 1	-0.470659	0.00379816
P50896	Protein PSP1	0.469448	0.00383323
Q03290	RNA polymerase II transcription factor B subunit 3	0.560204	0.00383734
Q12359	Ammonia transport outward protein 3	1.20839	0.00387365
P13587	Sodium/potassium exporting P-type ATPase 1	1.05387	0.00387518
P38827	Histone-lysine N-methyltransferase, H3 lysine-4 specific	0.934699	0.00387645
P54115	Magnesium-activated aldehyde dehydrogenase, cytosolic	0.0393903	0.00393709
P25340	Delta(24(24(1)))-sterol reductase ERG4	0.208848	0.00395793
P42837	Polyphosphoinositide phosphatase	0.766013	0.00398932
P38845	Cruciform DNA-recognizing protein 1	0.885956	0.00401518
P24004	Peroxisomal ATPase PEX1	0.480483	0.00401783
P38297	Mitofusin FZO1	0.0994708	0.00402863
P53741	UBP3-associated protein BRE5	0.352294	0.00403432
P10862	Postreplication repair E3 ubiquitin-protein ligase RAD18	0.759987	0.00408985
P53318	Ubiquinone biosynthesis monooxygenase COQ6, mitochondrial	0.62676	0.00411067
Q02555	Ribonuclease 3	0.649934	0.00411067
Q08058	Coenzyme Q-binding protein COQ10, mitochondrial	0.190886	0.00411095
P38197	Pyridoxal phosphate homeostasis protein	-0.520123	0.00411669
P33442	Small ribosomal subunit protein eS1A	0.342857	0.00411934
P22434	3',5'-cyclic-nucleotide phosphodiesterase 1	0.679862	0.00416702
P33419	Spindle pole component 29	0.617846	0.00416702
P10662	Small ribosomal subunit protein mS43	0.157892	0.00420347
P23337	Glycogen [starch] synthase isoform 1	0.565593	0.00421242
P02829	ATP-dependent molecular chaperone HSP82	0.375018	0.00422606
P32337	Importin subunit beta-3	0.444304	0.00422606
Q12117	Protein MRH1	0.165094	0.00422606
P06838	DNA repair protein RAD10	0.643585	0.00425054
P32491	MAP kinase kinase MKK2/SSP33	0.483356	0.00425054
P54839	Hydroxymethylglutaryl-CoA synthase	0.728323	0.00425054
P38756	tRNA threonylcarbamoyladenosine dehydratase 1	0.316649	0.00430577
P34111	Transcription factor tau 138 kDa subunit	-0.0242154	0.00432056
Q06511	Ribosomal RNA-processing protein 15	0.609998	0.00432056
P52917	Vacuolar protein sorting-associated protein 4	0.268295	0.00433922
P32561	Histone deacetylase RPD3	0.449385	0.00436688
P36080	Ribosomal RNA-processing protein 14	0.479935	0.00440747
P38149	Probable di- and tripeptidase DUG2	0.571394	0.00440747
P40857	Very-long-chain (3R)-3-hydroxyacyl-CoA dehydratase PHS1	0.644933	0.00440984
P49435	Adenine phosphoribosyltransferase 1	0.171076	0.00446386
Q08179	Mitochondrial distribution and morphology protein 38	0.445571	0.00446386
Q3E7A4	COX assembly mitochondrial protein 2	-0.697074	0.0044692
P07271	ATP-dependent DNA helicase PIF1	0.954936	0.00447833
P47018	Maintenance of telomere capping protein 1	-0.258362	0.00448541
Q05874	Protein N-terminal and lysine N-methyltransferase EFM7	0.496292	0.00449313
P36163	Mitochondrial metalloendopeptidase OMA1	0.248529	0.00449333
P00331	Alcohol dehydrogenase 2	-0.540467	0.00449748
P01119	Ras-like protein 1	0.429139	0.00449931
P0CY08;P0CY09	Mating-type protein ALPHA2;Silenced mating-type protein ALPHA2	1.03495	0.0045162
P22082	Transcription regulatory protein SNF2	0.802012	0.0045162
P43611	Outer spore wall protein 7	0.523096	0.0045162
Q12451	Oxysterol-binding protein homolog 2	0.316588	0.0045162
P39014	F-box protein MET30	0.268294	0.00451675
P33317	Deoxyuridine 5'-triphosphate nucleotidohydrolase	-1.0049	0.00455204
P29509	Thioredoxin reductase 1	-0.434022	0.00455473
P39083	Rho-type GTPase-activating protein 1	0.621296	0.00457097
P21771	Small ribosomal subunit protein uS15m	-0.448574	0.00463123
P34160	Nuclear cap-binding protein complex subunit 1	0.236069	0.00463419
P40508	PUP1 protein homolog	-0.588197	0.00471342
P28625	Protein YIM1	0.232625	0.00472892
Q03648	Uncharacterized protein YMR209C	0.57844	0.00472892
P38627	CTP synthase 2	0.369125	0.00477509
P53258	GTPase-activating protein GYP2	0.452657	0.00485563
Q02793	Antiviral protein SKI8	0.421585	0.00485563
Q99247	DUB-associated factor 1	0.253328	0.00488482
P28320	Splicing factor YJU2	0.50708	0.00488808
P38148	Dual specificity protein phosphatase PPS1	0.405424	0.00489472
P53969	Sorting assembly machinery 50 kDa subunit	0.423881	0.00498252
P36008	Elongation factor 1-gamma 2	0.339659	0.00499395
Q03012	COMPASS component SPP1	0.445941	0.00500766
P05756	Small ribosomal subunit protein uS15	0.634169	0.005067
P40969	Centromere DNA-binding protein complex CBF3 subunit B	0.492363	0.005067
Q05949	Protein BUR2	0.734018	0.00511268
P40477	Nucleoporin NUP159	0.324949	0.00514106
Q12309	Pre-mRNA-splicing factor CLF1	0.563413	0.00514391
P29465	Chitin synthase 3	0.38196	0.00518269
Q08748	Uncharacterized protein YOR296W	0.481981	0.00518269
P40462	Protein TMA108	0.0989656	0.00519187
Q12208	U6 snRNA phosphodiesterase 1	0.422911	0.00519187
P39552	Multicopy suppressor of SEC21 protein 28	0.497205	0.00520199
P29056	Transcription factor IIIB 70 kDa subunit	0.326626	0.00520641
P39965	Probable proline--tRNA ligase, mitochondrial	0.335089	0.00522915
Q12166	2-isopropylmalate synthase 2, mitochondrial	0.403858	0.00523232
P53221	Large ribosomal subunit protein uL24B	0.405302	0.00525126
P34110	Vacuolar protein sorting-associated protein 35	0.522686	0.00525493
P53840	Topoisomerase 1-associated factor 1	0.769627	0.00532882
Q03407	Serine/threonine-protein kinase PKH1	0.148153	0.00532882
Q12361	G protein-coupled receptor GPR1	0.597195	0.00532882
P53203	Peroxisomal membrane protein PEX31	0.446593	0.005366
P11710	Nuclear fusion protein FUS1	0.197642	0.0053738
Q02630	Nucleoporin NUP116/NSP116	0.35309	0.0053738
P52911	Glucan 1,3-beta-glucosidase 2	0.579378	0.00539694
P40079	U3 small nucleolar ribonucleoprotein protein LCP5	0.437767	0.00544107
P46675	Protein STU2	-0.366286	0.00546874
P53012	Acyl-coenzyme A diphosphatase SCS3	0.426192	0.00547592
P36148	Glycerol-3-phosphate O-acyltransferase 2	0.079874	0.00549241
Q01852	Mitochondrial import inner membrane translocase subunit TIM44	-0.0904281	0.00549504
P39692	Sulfite reductase [NADPH] flavoprotein component	1.23728	0.00550511
P53244	Arrestin-related trafficking adapter 5	0.591178	0.00552641
P89886	Translation machinery-associated protein 20	0.280762	0.00554515
P21801	Succinate dehydrogenase [ubiquinone] iron-sulfur subunit, mitochondrial	-0.055294	0.00554566
P38890	Putative protein lysine methyltransferase SET5	1.56566	0.00554622
P25042	Repressor ROX1	0.598664	0.00556061
P38624	Proteasome subunit beta type-1	0.603677	0.0055792
P47147	Phosphoinositide 3-phosphatase	1.28695	0.00558543
P32490	MAP kinase kinase MKK1/SSP32	0.696743	0.00561861
P53632	Poly(A) RNA polymerase protein 2	0.9339	0.00562263
P38772	Box C/D snoRNA protein 1	0.937043	0.00562868
P40088	Plasma membrane iron permease	0.628292	0.00564096
P38823	E3 ubiquitin-protein ligase DMA1	0.232334	0.00565997
P53540	Spindle pole body component SPC98	0.682664	0.00567171
P31374	Serine/threonine-protein kinase PSK1	0.150524	0.00570943
Q12212	Protein SIA1	0.371472	0.00572572
P06787	Calmodulin	0.539317	0.00573452
Q06102	mRNA 3'-end-processing protein YTH1	0.475532	0.00575472
P50276	High-affinity methionine permease	0.53195	0.00577912
Q04053	Sorting nexin-41	0.615274	0.00581212
P34761	Protein WHI3	0.614828	0.00583775
P05739	Large ribosomal subunit protein eL6B	0.394964	0.00584227
P36064	COX assembly mitochondrial protein	-0.766895	0.00585582
Q12753	Transcriptional activator HAA1	-0.474415	0.00586145
P53123	rRNA methyltransferase 2, mitochondrial	0.650167	0.0058728
P30902	ATP synthase subunit d, mitochondrial	0.39061	0.00597576
P36136	Sedoheptulose 1,7-bisphosphatase	0.02404	0.00597576
P33401	Phosphoglucomutase 1	0.556754	0.00600841
Q06680	Condensin complex subunit 3	0.546665	0.00600841
Q04031	Ribosomal RNA-processing protein 17	0.510728	0.00600897
P22224	Exocyst complex component SEC15	0.314646	0.00602171
P19736	Pre-mRNA-splicing factor PRP9	0.663313	0.00604895
P29366	Bud emergence protein 1	0.262058	0.00606634
Q05998	Thiamine transporter	0.67108	0.00612124
P32336	Protein NUD1	0.610163	0.00613258
Q12194	RHO1 GEF localizing protein 1	0.491088	0.00613367
P15801	DNA polymerase gamma	0.126037	0.00613788
P38009	Bifunctional purine biosynthesis protein ADE17	-0.340101	0.00613788
Q08234	Uncharacterized ABC transporter ATP-binding protein/permease YOL075C	0.564446	0.00614451
P36114	IML2-like protein YKR018C	0.519458	0.00618423
Q12134	Protein HUA2	0.297701	0.00618437
P47046	Uncharacterized protein IRC8	0.374246	0.00620433
P25043	Proteasome subunit beta type-2	0.42439	0.00621171
Q99296	Uncharacterized protein YLR149C	0.583389	0.00622471
P39994	Putative 2-hydroxyacyl-CoA lyase	0.120705	0.00627912
Q03002	Fatty acyl-CoA synthetase and RNA processing-associated kinase 1	0.378319	0.0062835
Q12495	Chromatin assembly factor 1 subunit p90	0.29105	0.00629149
P05373	Delta-aminolevulinic acid dehydratase	-0.327919	0.00632937
Q12118	Small glutamine-rich tetratricopeptide repeat-containing protein 2	-0.308115	0.00641336
Q99220	Protein OS-9 homolog	0.488327	0.00641336
P36157	Putative transcriptional activator MSA2	0.762173	0.00646606
P25368	Ribosomal RNA-processing protein 7	0.304982	0.00648162
P47026	GPI-anchored wall transfer protein 1	0.427856	0.00648162
P25356	Beige protein homolog 1	0.163786	0.00651094
Q12001	Dolichyl pyrophosphate Man9GlcNAc2 alpha-1,3-glucosyltransferase	0.533198	0.00651094
P53183	Putative uncharacterized oxidoreductase YGL039W	0.324309	0.00653862
P26448	Mitotic check point protein BUB2	0.309979	0.00654335
Q00246	GTP-binding protein RHO4	0.41403	0.00654335
P53236	Chromatin structure-remodeling complex subunit RSC1	0.216955	0.00655051
Q04311	tRNA endonuclease VMS1	1.24538	0.00655811
P21524	Ribonucleoside-diphosphate reductase large chain 1	0.175687	0.00657774
Q04370	Peroxisome assembly protein 12	0.511496	0.00658272
P00431	Cytochrome c peroxidase, mitochondrial	-0.58025	0.00661854
P25567	RNA-binding protein SRO9	0.219661	0.00662084
P50861	6,7-dimethyl-8-ribityllumazine synthase	-0.690572	0.00662326
P25846	DNA mismatch repair protein MSH1, mitochondrial	0.414735	0.00663195
P53199	Sterol-4-alpha-carboxylate 3-dehydrogenase ERG26, decarboxylating	0.313139	0.00663907
P37254	Aminodeoxychorismate synthase	0.978307	0.00672103
P36012	Histone H3-like centromeric protein CSE4	0.4296	0.00672215
P53220	Mitochondrial import inner membrane translocase subunit TIM21	0.310304	0.00673937
P34226	Chitin synthase regulator SKT5	0.29182	0.00675792
Q99359	Protein RAD61	0.990113	0.00682003
P42834	Mitochondrial DnaJ homolog 2	0.565414	0.00682909
P16370	DNA-directed RNA polymerase II subunit RPB3	0.471477	0.0068398
P38071	Enoyl-[acyl-carrier-protein] reductase, mitochondrial	0.419845	0.00685554
P31381	Nucleoside transporter FUN26	0.415577	0.00690474
Q08651	Probable oxidoreductase ENV9	0.628569	0.00691681
P33313	Hsp70/Hsp90 co-chaperone CNS1	0.655579	0.00691921
P39875	Exodeoxyribonuclease 1	0.945222	0.00692539
P38850	Regulator of Ty1 transposition protein 107	2.76579	0.00700608
Q03148	Pyridoxal 5'-phosphate synthase subunit SNZ1	0.742314	0.00705701
Q00578	General transcription and DNA repair factor IIH helicase subunit XPB	0.825604	0.0070603
P36160	Ribosome biogenesis protein RPF2	0.683885	0.00706585
P36145	Transcription initiation factor IIE subunit beta	0.670271	0.00708271
Q04511	Ubiquitin ligase complex F-box protein UFO1	0.483729	0.00714594
Q08645	Folylpolyglutamate synthase	0.360213	0.00725648
P42843	F-box protein SKP2	0.753635	0.00728307
P32584	Protein-S-isoprenylcysteine O-methyltransferase	0.254557	0.00729323
Q12172	Zinc finger transcription factor YRR1	0.699039	0.00740825
P32468	Cell division control protein 12	0.447555	0.0074148
P15790	Casein kinase II subunit alpha	0.29627	0.00742385
P33750	Protein SOF1	0.166288	0.00745718
Q08444	20S-pre-rRNA D-site endonuclease NOB1	0.602724	0.00753958
P11655	Guanine nucleotide-exchange factor SEC12	0.198126	0.0075457
Q03900	Uncharacterized protein YDR132C	0.4506	0.00754969
P07251	ATP synthase subunit alpha, mitochondrial	0.156409	0.00755727
P21339	Morphogenesis-related protein MSB1	0.319271	0.00755727
P53256	Exosome complex component RRP46	0.494277	0.00755727
P06100	General negative regulator of transcription subunit 2	0.356227	0.00757095
P33755	Nuclear protein localization protein 4	0.258541	0.00757095
Q12297	Transcription initiation factor TFIID subunit 3	0.642585	0.00757095
P00360	Glyceraldehyde-3-phosphate dehydrogenase 1	-0.667472	0.00759567
P40157	Vacuolar import and degradation protein 27	-0.195155	0.00761191
Q12221	mRNA-binding protein PUF2	0.227249	0.00761191
P39723	Spindle pole component SPC72	0.438165	0.00761235
P40422	DNA-directed RNA polymerases I, II, and III subunit RPABC4	0.299179	0.00761235
P47008	Phosphatidylinositol transfer protein SFH5	0.361295	0.00765289
Q03653	Protein EFR3	0.591676	0.00769001
P38753	Class E vacuolar protein-sorting machinery protein HSE1	0.0683721	0.00770491
P21954	Isocitrate dehydrogenase [NADP], mitochondrial	0.132454	0.00773226
P06775	Histidine permease	0.4152	0.00773377
Q04922	Mitochondrial F-box protein MFB1	0.467623	0.00779128
P33895	Kinetochore protein NUF2	0.762599	0.00784957
P16639	Arginyl-tRNA--protein transferase 1	0.733854	0.00785711
Q04377	DNA damage checkpoint protein LCD1	0.916513	0.00785711
P53550	m7GpppN-mRNA hydrolase	0.389082	0.00786535
P38193	Serine/threonine-protein phosphatase 4 regulatory subunit 2	0.459233	0.00786994
P48589	Small ribosomal subunit protein eS12	0.365768	0.0078803
P34244	Probable serine/threonine-protein kinase HSL1	0.454138	0.00792246
P53159	Monopolar spindle protein 2	0.381669	0.00792246
Q3E7B2	Cytochrome c oxidase assembly factor 3, mitochondrial	-0.691474	0.00792246
P25604	Suppressor protein STP22 of temperature-sensitive alpha-factor receptor and arginine permease	0.500017	0.0079252
P40535	ATF/CREB activator 2	0.167852	0.0079252
Q00362	Protein phosphatase PP2A regulatory subunit B	0.372618	0.0079252
Q02457	Protein TBF1	-0.357828	0.00793191
Q12000	Translation machinery-associated protein 46	0.756191	0.00793191
Q12676	Dihydrofolate synthetase	0.342284	0.00800212
P53295	Ribosome-interacting GTPase 2	0.545045	0.00804641
P32524	Pre-mRNA-splicing factor PRP21	0.53635	0.00804968
P38271	Protein OPY1	0.308712	0.00804968
P38786	Ribonuclease P/MRP protein subunit RPP1	0.315057	0.00804968
Q08157	Uncharacterized membrane protein YOL019W	0.401421	0.00806974
P38177	Uncharacterized protein YBL086C	0.420752	0.00808763
P07260	Eukaryotic translation initiation factor 4E	0.352441	0.00809729
Q08986	S-adenosylmethionine permease SAM3	0.622682	0.00809729
Q12276	HMG2-induced ER-remodeling protein 1	0.490893	0.00810412
P36144	Ribosome biogenesis protein UTP30	0.0994002	0.00812589
Q03579	Ceramide synthase subunit LIP1	0.245209	0.00812604
P11709	Nuclear fusion protein BIK1	0.536649	0.00814888
P49090	Asparagine synthetase [glutamine-hydrolyzing] 2	0.211086	0.0081497
P40541	Cohesin subunit SCC3	0.714073	0.00815997
Q05919	Vacuolar protein sorting-associated protein 38	0.452687	0.00815997
P15274	AMP deaminase	0.367743	0.00818864
P32496	26S proteasome regulatory subunit RPN12	0.397691	0.0081996
P36066	Protein MRG3-like	0.637792	0.0081996
P46985	Probable alpha-1,6-mannosyltransferase MNN11	0.0169811	0.00820318
P28817	Small ribosomal subunit protein mS47	0.0501303	0.00821764
Q02554	Cold sensitive U2 snRNA suppressor 1	0.664634	0.00821764
Q08746	Regulator of ribosome biosynthesis	0.242452	0.00821764
P38351	RNA polymerase II-associated protein 1	0.596744	0.00823923
P25605	Acetolactate synthase small subunit, mitochondrial	0.412912	0.00827885
P32844	Exocyst complex component SEC6	0.1711	0.00829966
P38077	ATP synthase subunit gamma, mitochondrial	0.464805	0.00829966
P38346	Probable target of rapamycin complex 2 subunit BIT2	0.59675	0.00829966
P46992	Cell wall protein YJL171C	0.640051	0.00831143
Q08491	Superkiller protein 7	0.663531	0.00831143
P46963	CTD kinase subunit gamma	0.766089	0.00843678
Q05635	Ribonuclease H2 subunit B	0.70134	0.00848098
P32605	U1 small nuclear ribonucleoprotein A	0.885887	0.00849651
Q01454	DNA polymerase alpha-binding protein	0.411103	0.00850798
Q03764	Ethanolamine kinase	0.78472	0.00854852
P40493	25S rRNA (uridine(2634)-N(3))-methyltransferase	0.87908	0.00854924
P48353	Protein HLJ1	0.477864	0.00857695
P41814	tRNA (adenine(58)-N(1))-methyltransferase non-catalytic subunit TRM6	0.622332	0.00859414
P38277	Uncharacterized protein YBR138C	0.0961859	0.00866777
P53286	Protein BTN2	0.735897	0.00867198
P48439	Dolichyl-diphosphooligosaccharide--protein glycosyltransferase subunit 3	0.429895	0.00870169
P53929	Uncharacterized protein YNL108C	0.194666	0.00870169
Q01662	Methionine aminopeptidase 1	-0.196597	0.00872034
P38138	Glucosidase 2 subunit alpha	0.522692	0.00872757
P39533	Homocitrate dehydratase, mitochondrial	0.47021	0.00879087
P35177	Transcriptional activator SPT7	-0.0348117	0.00884054
P43592	Factor arrest protein 7	0.568303	0.00890105
Q06580	Myosin light chain 2	-0.118736	0.00892159
Q12052	Trimethylguanosine synthase	0.476907	0.00892738
P43124	Non-structural maintenance of chromosome element 4	0.322204	0.0089305
P35201	Inner kinetochore subunit MIF2	0.284455	0.00893572
P40335	Carboxypeptidase Y-deficient protein 8	0.509929	0.00905556
P32522	Pentatricopeptide repeat-containing protein PET309, mitochondrial	0.274552	0.00906397
P32558	FACT complex subunit SPT16	0.234019	0.00908614
P38255	Transcriptional regulatory protein RXT2	0.579456	0.00908614
P03878	Intron-encoded DNA endonuclease aI4	1.3861	0.00912791
P38283	Inner centromere protein-related protein SLI15	0.842182	0.0091496
P33296	Ubiquitin-conjugating enzyme E2 6	0.446344	0.00918849
Q04177	U3 small nucleolar RNA-associated protein 5	0.170974	0.00918849
Q04418	RNA polymerase II-associated protein RBA50	0.489802	0.00929026
P40955	Chitin biosynthesis protein CHS6	1.32454	0.00929736
P30777	GPI mannosyltransferase 3	0.306609	0.00931066
P53739	Flippase kinase 1	0.522214	0.00933074
P21827	Guanine nucleotide exchange factor SRM1	-0.34104	0.00933545
P53248	Peroxisomal biogenesis factor 8	0.52931	0.00934259
Q08622	Genetic interactor of prohibitins 3, mitochondrial	0.31103	0.00934259
Q00381	AP-2 complex subunit sigma	0.564274	0.00938122
Q04430	Pantothenate kinase CAB1	0.842825	0.00940494
P54074	ERAD-associated E3 ubiquitin-protein ligase ASI1	0.518032	0.0094293
P35178	Ribosomal RNA-processing protein 1	0.232051	0.00944968
Q12393	Genetic interactor of prohibitin 5, mitochondrial	0.324809	0.00944968
Q99260	GTP-binding protein YPT6	0.414918	0.00947577
P20606	Small COPII coat GTPase SAR1	0.347977	0.00951061
Q03898	Filament protein FIN1	0.573322	0.00951061
Q08970	Mitochondrial metal transporter 2	0.458304	0.00951061
P20459	Eukaryotic translation initiation factor 2 subunit alpha	0.400876	0.00953149
P53148	Spindle pole body component SPC105	0.692875	0.00953149
P40452	Cytochrome c oxidase assembly factor 1	-0.269559	0.00956811
P38239	Uncharacterized RING finger protein YBR062C	0.559573	0.00962902
P38880	Mitochondrial distribution and morphology protein 31	0.480374	0.00966728
P36060	NADH-cytochrome b5 reductase 2	0.452742	0.00974325
P43571	GPI inositol-deacylase	0.25515	0.00989273
Q03429	Mitochondrial zinc maintenance protein 1, mitochondrial	-1.05677	0.0099161
Q05948	Uncharacterized SVF1-like protein YLR225C	0.537715	0.00997703
Q08649	Histone acetyltransferase ESA1	0.603766	0.00997703
P40077	Protein DSE1	0.642467	0.00998177
P28000	DNA-directed RNA polymerases I and III subunit RPAC2	0.450392	0.00998538
P42942	Uncharacterized GTP-binding protein YGR210C	0.423988	0.0100036
P25378	Rheb-like protein RHB1	0.593136	0.0100192
P25454	DNA repair protein RAD51	0.394317	0.0100342
P25386	Intracellular protein transport protein USO1	0.403532	0.0100465
P20433	DNA-directed RNA polymerase II subunit RPB4	0.566653	0.0100607
Q12420	66 kDa U4/U6.U5 small nuclear ribonucleoprotein component	0.687558	0.0100607
Q04401	Succinate dehydrogenase assembly factor 3, mitochondrial	-0.766259	0.0100637
Q03655	Probable 1,3-beta-glucanosyltransferase GAS3	-0.158592	0.0101022
P40578	Protein MGA2	0.314657	0.0101037
P50111	Protein ZDS1	0.69677	0.0101293
Q99369	Family of serine hydrolases 3	0.246716	0.0101403
P43606	SPS-sensor component PTR3	0.804851	0.010179
P38198	Protein STU1	0.445936	0.0101881
P07285	Anthranilate phosphoribosyltransferase	0.573148	0.0102606
P32469	Diphthine methyl ester synthase	-0.722156	0.0102694
P53201	SWR1-complex protein 4	0.800347	0.0102986
Q08109	ERAD-associated E3 ubiquitin-protein ligase HRD1	0.363611	0.0103844
P36528	Large ribosomal subunit protein mL46	-0.0852761	0.0104407
P32863	DNA repair and recombination protein RAD54	0.905707	0.0104441
P11745	Ran GTPase-activating protein 1	0.713995	0.0104579
P38853	Kelch repeat-containing protein 1	0.168389	0.0104579
Q08230	Succinate dehydrogenase assembly factor 2, mitochondrial	-0.813093	0.0104904
P38795	Glutamine-dependent NAD(+) synthetase	0.294134	0.0105077
Q12440	Anaphase-promoting complex subunit 2	0.175014	0.0105077
Q02932	Importin beta-like protein KAP120	0.425475	0.0105351
P32909	Protein SMY2	0.424083	0.0105762
P39705	Nucleoporin NUP60	0.604202	0.0105786
Q12078	Iron transporter SMF3	0.0740371	0.0106915
P38837	Protein NSG1	0.343768	0.0107144
P39984	Histone acetyltransferase type B subunit 2	0.610674	0.0107757
Q12233	ATP synthase subunit g, mitochondrial	0.48747	0.0107758
P38116	ADP-ribosylation factor-like protein 1	0.469789	0.010776
P07274	Profilin	-2.62263	0.0108519
P38221	Phosphatidate cytidylyltransferase	0.0549101	0.0108969
P23796	tRNA A64-2'-O-ribosylphosphate transferase	0.597391	0.0109407
P14747	Serine/threonine-protein phosphatase 2B catalytic subunit A2	-0.0435601	0.0109968
P32467	Low-affinity glucose transporter HXT4	-0.665095	0.011069
P46973	Protein HIT1	0.942216	0.0111041
Q02981	ABC1 family protein YPL109C, mitochondrial	0.393759	0.0111055
P38196	Uridine permease	0.478067	0.0111161
Q08285	Exosome complex component RRP40	0.26118	0.0111606
P38738	Oxidant-induced cell-cycle arrest protein 5	1.24038	0.0112465
Q03195	Translation initiation factor RLI1	0.127816	0.0112695
P47169	Sulfite reductase [NADPH] subunit beta	0.588527	0.0112841
P54780	Large ribosomal subunit protein eL15B	0.326374	0.0112872
P17423	Homoserine kinase	-0.173373	0.0112999
Q12375	Mitochondrial ornithine transporter 1	0.472803	0.0112999
Q12523	WD repeat-containing protein YPL247C	0.465021	0.0112999
P40351	Dolichyl pyrophosphate Glc1Man9GlcNAc2 alpha-1,3-glucosyltransferase	0.506819	0.0113195
P36085	Protein STB6	0.664595	0.0113377
P07257	Cytochrome b-c1 complex subunit 2, mitochondrial	0.121235	0.0113733
P40484	DBF2 kinase activator protein MOB1	0.263121	0.0114505
P36056	Probable S-adenosyl-L-methionine-dependent RNA methyltransferase RSM22, mitochondrial	-0.220317	0.0114678
Q02629	Nucleoporin NUP100/NSP100	0.452284	0.0115213
P40207	Ergosterol biosynthesis protein 29	0.613402	0.0115419
P28707	Co-chaperone protein SBA1	-0.543711	0.0116272
Q07949	Probable phosphatase PSR2	0.628152	0.0116272
P38703	Ceramide synthase LAG1	0.401838	0.0116457
P38080	Serine/threonine-protein kinase AKL1	0.267351	0.0116681
Q06188	PWWP domain-containing protein YLR455W	0.640165	0.0117976
Q04003	Something about silencing protein 4	0.592492	0.0118134
Q02642	Nascent polypeptide-associated complex subunit beta-1	0.396053	0.0118409
Q08268	Probable transporter MCH4	0.416958	0.0118643
P32642	Monothiol glutaredoxin-4	0.041623	0.0118769
P42845	Protein STB1	0.975268	0.0118803
P34232	mRNA transport regulator MTR2	0.472625	0.0119022
P40218	Uncharacterized protein YMR147W	0.629706	0.0119857
Q04969	Signal peptidase complex subunit 2	0.594119	0.0120316
Q04792	Glutamate decarboxylase	0.717382	0.0120455
Q04651	ER-derived vesicles protein ERV41	0.0259078	0.0120677
Q02884	Elongator complex protein 4	0.256051	0.0122337
Q04533	Putative cystathionine gamma-synthase YML082W	0.502765	0.0122337
P00498	ATP phosphoribosyltransferase	-0.369102	0.0123523
P53834	Hsp90 co-chaperone HCH1	0.223735	0.0123584
P19454	Casein kinase II subunit alpha'	0.520423	0.012435
P07991	Ornithine aminotransferase	-0.224212	0.0124396
Q12675	Phospholipid-transporting ATPase DNF2	0.255	0.0124396
P53129	Vacuolar fusion protein MON1	0.412617	0.0125074
P43579	Ino eighty subunit 1	0.00734848	0.0125121
P52488	Ubiquitin-activating enzyme E1-like	0.935656	0.0125258
Q06523	Uncharacterized protein YPR148C	-0.793151	0.0125529
Q12050	Telomere length regulation protein ELG1	0.676406	0.0126878
P39727	ER-derived vesicles protein ERV46	0.435388	0.0127012
P47068	Myosin tail region-interacting protein MTI1	0.380099	0.0127626
P49954	Omega-amidase NIT3	-0.217005	0.0127626
P38306	Uncharacterized protein YBR197C	0.543902	0.0127916
O13563	26S proteasome regulatory subunit RPN13	0.53936	0.0129018
P40017	Carnitine O-acetyltransferase YAT2	0.87942	0.0129018
Q12335	Protoplast secreted protein 2	0.302887	0.0129018
P38319	Tyrosyl-DNA phosphodiesterase 1	1.22636	0.0129367
P04037	Cytochrome c oxidase subunit 4, mitochondrial	0.660593	0.0129392
Q08818	Meiotic sister-chromatid recombination protein 6, mitochondrial	0.30943	0.0129957
P38787	2-dehydropantoate 2-reductase	0.0210776	0.0130579
P38701	Small ribosomal subunit protein uS10	0.413354	0.0131541
P03871	Partitioning protein REP1	0.458774	0.0131938
P53127	E3 ubiquitin-protein ligase SNT2	0.528353	0.0133375
P40018	Small nuclear ribonucleoprotein-associated protein B	0.779829	0.0134352
P38740	Uncharacterized protein YHL026C	0.763291	0.0134522
P40560	Ankyrin repeat-containing protein YIL001W	0.500674	0.0134615
P32353	Delta(7)-sterol 5(6)-desaturase ERG3	0.465841	0.0134648
P39946	Nuclear distribution protein PAC1	0.637387	0.0135815
Q12445	Nucleoporin POM34	0.360746	0.0135884
P53281	LAS seventeen-binding protein 1	-0.254626	0.013632
Q01649	Spindle pole body-associated protein CIK1	0.824531	0.013632
P22148	Protein MSN1	0.758173	0.0137534
P40008	Protein FMP52, mitochondrial	0.503394	0.0138658
P32901	Peptide transporter PTR2	0.499294	0.0139189
P36015	Synaptobrevin homolog YKT6	0.312265	0.0140432
P48526	Isoleucine--tRNA ligase, mitochondrial	-0.248957	0.0141178
Q03441	Sporulation protein RMD1	0.315507	0.014203
P42949	Mitochondrial import inner membrane translocase subunit TIM16	-0.182094	0.0142824
P53086	Kinesin-like protein KIP3	0.612466	0.0142987
P53008	Mannosyl-oligosaccharide glucosidase	0.436556	0.0143462
Q12522	Eukaryotic translation initiation factor 6	0.52818	0.0145463
P39966	Protein phosphatase 2C homolog 2	-0.569875	0.0146218
P38344	Cytoplasmic 60S subunit biogenesis factor REI1	0.315194	0.0146577
Q08687	Translation machinery-associated protein 16	0.600286	0.0147199
P32843	Mitochondrial escape protein 2	0.0869434	0.0147795
P35719	Uncharacterized protein MRP8	-0.151233	0.0148345
P36100	Transcription initiation factor IIE subunit alpha	0.738518	0.0149456
P0CE41	Heme-responsive zinc finger transcription factor HAP1	0.106005	0.0149906
P53267	DASH complex subunit DAM1	0.574206	0.015055
P13711	Acyl-coenzyme A oxidase	0.665822	0.0151523
P38877	Chromosome transmission fidelity protein 8	0.658866	0.0151807
P04051	DNA-directed RNA polymerase III subunit RPC1	0.517467	0.0152546
P25656	Phospholipid-transporting ATPase accessory subunit CDC50	0.472934	0.0152719
Q12034	Protein SLF1	0.283821	0.0153305
P38226	2-acyl-1-lysophosphatidylinositol acyltransferase	0.267984	0.0153505
Q06628	Autophagy-related protein 13	0.529356	0.0155841
P23287	Serine/threonine-protein phosphatase 2B catalytic subunit A1	0.268355	0.0155995
P38347	Protein-lysine N-methyltransferase EFM2	0.479485	0.0156306
P39112	Exoribonuclease II, mitochondrial	0.480252	0.0156306
Q08773	ISWI chromatin-remodeling complex ATPase ISW2	0.168024	0.0156306
P47102	ARF guanine-nucleotide exchange factor 1	0.785539	0.015688
P38355	Uncharacterized transporter YBR287W	0.379664	0.0157952
P54785	Transcriptional activator/repressor MOT3	0.75464	0.0158199
P46671	Factor arrest protein 3	0.256201	0.0158279
P36116	Vacuolar protein sorting-associated protein 51	0.541784	0.0158479
P47016	Deaminated glutathione amidase	0.623048	0.0158479
P36070	RNA polymerase I-specific transcription initiation factor RRN3	1.21717	0.0158912
P31787	Acyl-CoA-binding protein	-0.946362	0.0159699
P25578	CDP-diacylglycerol--glycerol-3-phosphate 3-phosphatidyltransferase	0.44457	0.0160324
P38859	DNA replication ATP-dependent helicase/nuclease DNA2	0.181262	0.016072
Q12084	Putative uridine kinase DAS2	0.591025	0.0161136
P32784	Glycerol-3-phosphate O-acyltransferase 1	0.320251	0.0161872
P0CX31;P0CX32	Small ribosomal subunit protein eS24A;Small ribosomal subunit protein eS24B	0.524556	0.0162167
Q12432	Chromatin modification-related protein EAF3	0.564348	0.0162446
Q04935	Cytochrome c oxidase assembly protein COX20, mitochondrial	0.296222	0.0163146
Q05040	Factor arrest protein 8	0.146242	0.0163749
P43612	SIT4-associating protein SAP155	0.470606	0.0164651
Q06001	Factor arrest protein 10	0.211905	0.0166464
Q07451	Endoplasmic reticulum transmembrane protein 3	-0.221534	0.016657
P53292	Small ribosomal subunit protein mS45	-0.428442	0.0166589
P54784	Origin recognition complex subunit 1	0.395809	0.0166829
P41813	Fork head protein homolog 2	0.533577	0.0168591
Q01976	ADP-ribose pyrophosphatase	-0.969594	0.0169559
P32800	Peroxisomal biogenesis factor 2	0.257456	0.0170817
P39008	Poly(A) ribonuclease POP2	0.415466	0.0170817
Q08774	Required for respiratory growth protein 7, mitochondrial	-0.306013	0.0170858
P10869	Aspartokinase	0.70305	0.0171196
Q04601	Anaphase-promoting complex subunit 4	0.304535	0.017183
Q04002	Sister chromatid cohesion protein 2	0.0103515	0.0171961
Q08686	Thiosulfate sulfurtransferase TUM1	0.304594	0.0172012
P51862	RHO1 GDP-GTP exchange protein 2	0.400399	0.0172196
P17629	THO complex subunit HPR1	0.289074	0.017329
P08456	CDP-diacylglycerol--serine O-phosphatidyltransferase	0.328548	0.0174449
P53868	Alpha-1,2-mannosyltransferase ALG9	0.407822	0.0174648
Q12004	General transcription and DNA repair factor IIH subunit TFB4	0.33913	0.0175216
Q12408	Phosphatidylglycerol/phosphatidylinositol transfer protein	1.04302	0.0175487
Q03833	Transcriptional activator/repressor GIS1	0.670375	0.0175746
P40056	Golgi to ER traffic protein 2	0.573351	0.0177017
Q03694	Inheritance of peroxisomes protein 1	0.318017	0.0177693
P53289	Protein phosphatase type 2A regulatory subunit RTS3	0.713687	0.0177808
Q02206	Chromatin structure-remodeling complex subunit RSC4	0.33245	0.0178535
P40161	Histone chaperone RTT106	-0.117745	0.0179709
Q00711	Succinate dehydrogenase [ubiquinone] flavoprotein subunit, mitochondrial	-0.00970149	0.0180144
P25559	Sister chromatid cohesion protein DCC1	0.565127	0.0180883
Q04347	Bud site selection protein 22	0.45696	0.0181077
[truncated: 1,964 more rows]
